# Supplementary material for: The application of the MM/GBSA method in the binding pose prediction of FGFR inhibitors
Source: Royal Society of Chemistry journal article supplement (doi:10.1039/d0cp00831a), 2020-01-01
Supplement: d0cp00831a1.pdf [file d0cp00831a1.pdf]

# Supplementary Information

## The Application of MM/GBSA Method in the Binding Pose Prediction of FGFR Inhibitors

Yu Chen,<sup>a,‡</sup> Yongxiang Zheng,<sup>a,‡</sup> Shengjun Mao,<sup>a</sup> Pedro Fong<sup>b</sup> and Qiantao Wang<sup>a,\*</sup>

<sup>a</sup> Key Laboratory of Drug-Targeting and Drug Delivery System of the Education Ministry, Sichuan Engineering Laboratory for Plant-Sourced Drug and Sichuan Research Center for Drug Precision Industrial Technology, West China School of Pharmacy, Sichuan University, Chengdu 610041, China.

<sup>b</sup> School of Health Sciences and Sports, Macao Polytechnic Institute, Rua de Luís Gonzaga Gomes, Macao, China

<sup>‡</sup>These authors contributed equally.

\*Corresponding author: Qiantao Wang (qwang@scu.edu.cn).

### Table of Contents

|                                 |            |
|---------------------------------|------------|
| <b>1. Supplementary Figures</b> | <b>S2</b>  |
| <b>2. Supplementary Tables</b>  | <b>S13</b> |
| <b>3. Abbreviations</b>         | <b>S43</b> |
| <b>References</b>               | <b>S44</b> |

## 1. Supplementary Figures

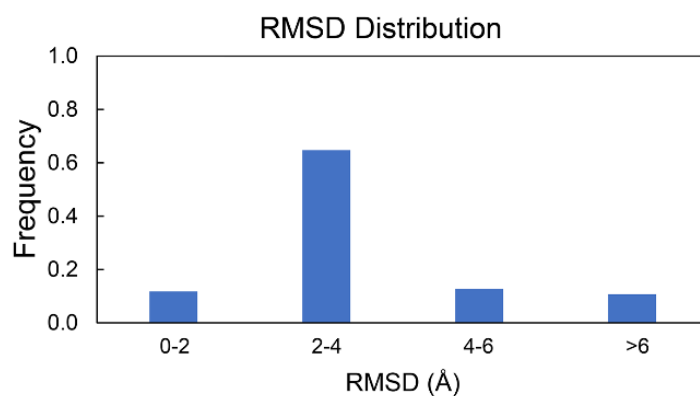

**Figure S1.** The distribution of RMSD values of poses generated by Autodock Vina.

The RMSD was calculated against the top ranked pose of each ligand.

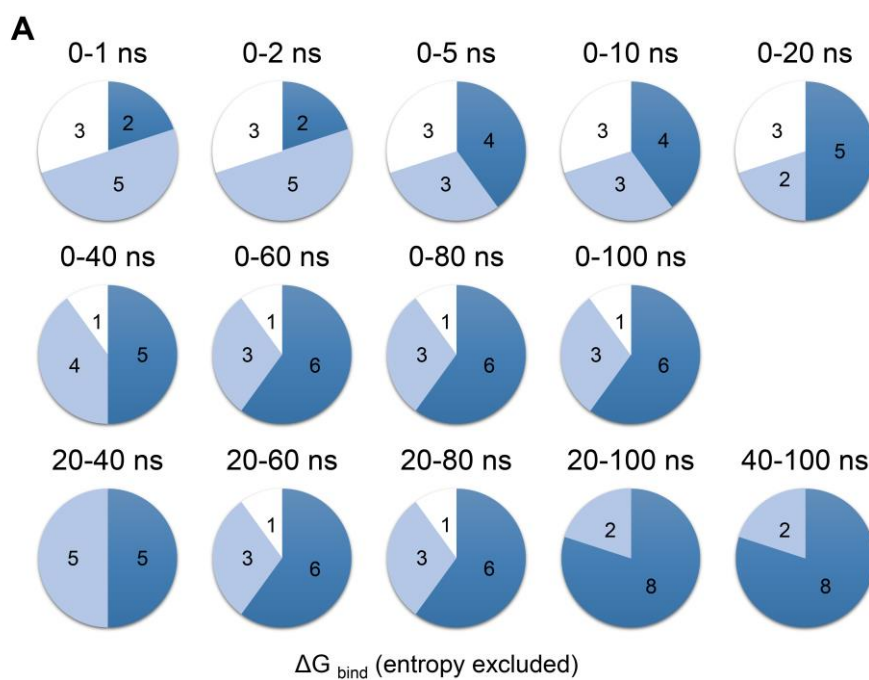

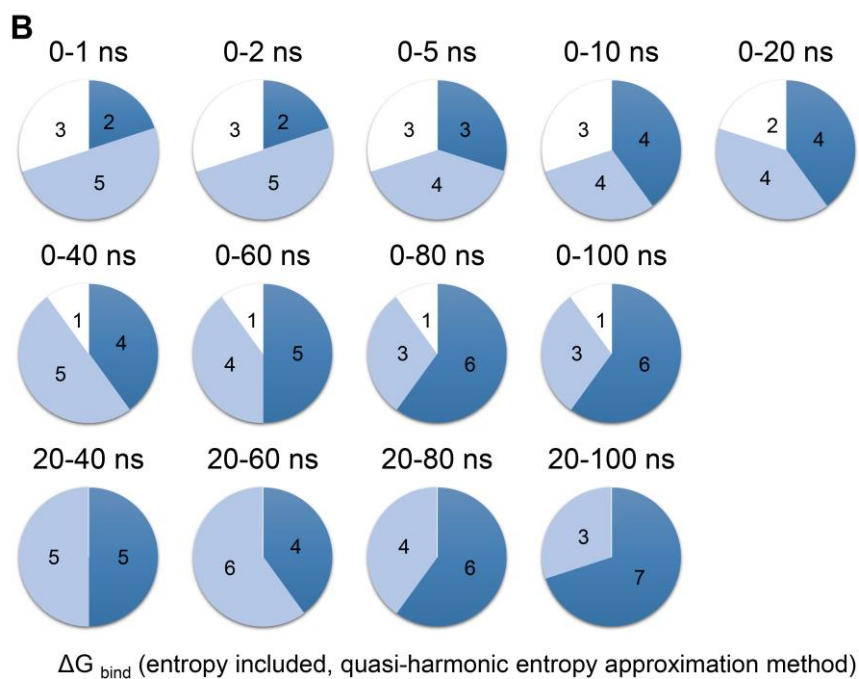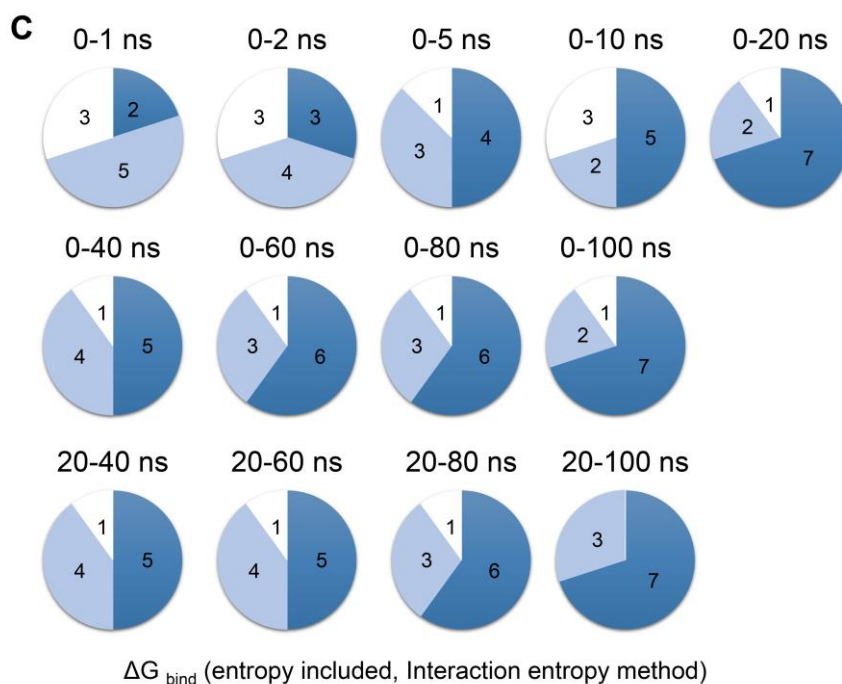

Crystal conformation
  Conformation1
  Other conformations

**Figure S2. Pie charts show the correct cases that MM/GBSA predicts the crystal conformation being the lowest energy pose in a serial of time periods. MM/GBSA binding energy without entropy (A), with the quasi-harmonic analysis entropy (B) and**

with the interaction entropy<sup>1</sup> (C) were separately demonstrated. The area in dark blue corresponds to crystal conformation had the lowest energy, light blue corresponds to that conformation1 (the conformation that was closest to the crystal structure was ranked as conformation 1 using AutoDock Vina) had the lowest energy and white corresponds to that other conformations had the lowest energy.

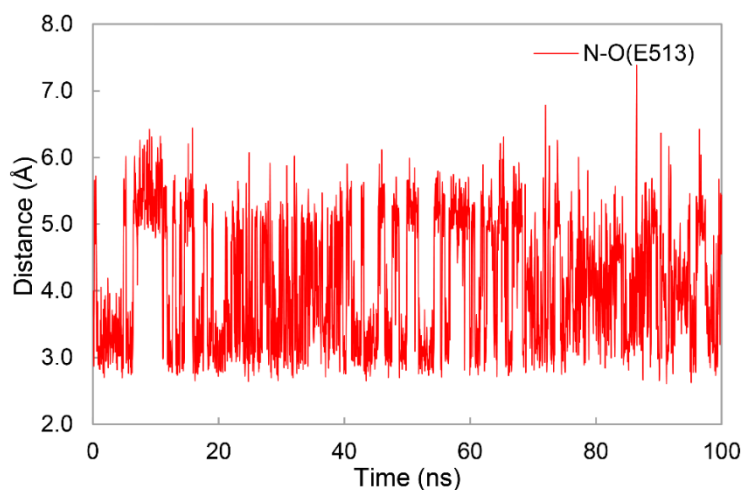

**Figure S3.** The hydrogen bond (N-O (E513)) between E3810-con2 and FGFR1 was not stable during the 100 ns MD simulation.

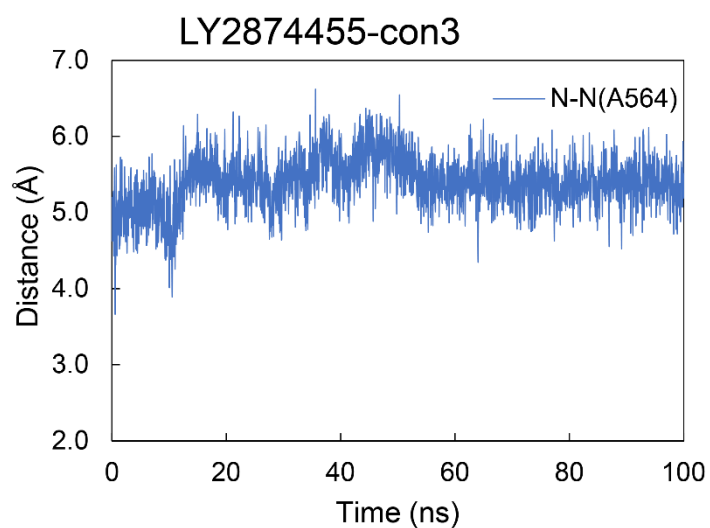

**Figure S4.** The distance between the indazole ring of LY2874455-con3 and residue A564 in the hinge region of FGFR1 was  $5.4 \pm 0.3 \text{ \AA}$  (N-N (A564)) during the 100 ns simulation, indicating there is no hydrogen bond between them.

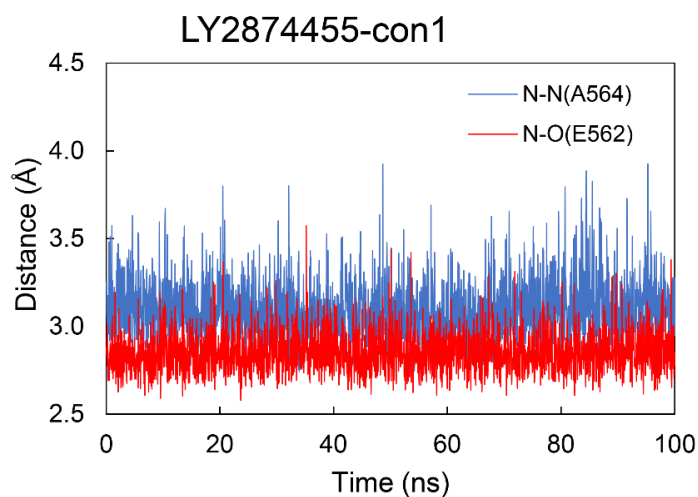

**Figure S5.** The hydrogen bonds between LY2874455-con1 and FGFR1 remained stable during the 100 ns simulation, given the average hydrogen bond distances of  $3.1 \pm 0.2 \text{ \AA}$  for N-N (A564) (in blue) and  $2.9 \pm 0.1 \text{ \AA}$  for N-O (E562) (in red). This is in line with the binding free energy predicted by MM/GBSA (Figure 6D).

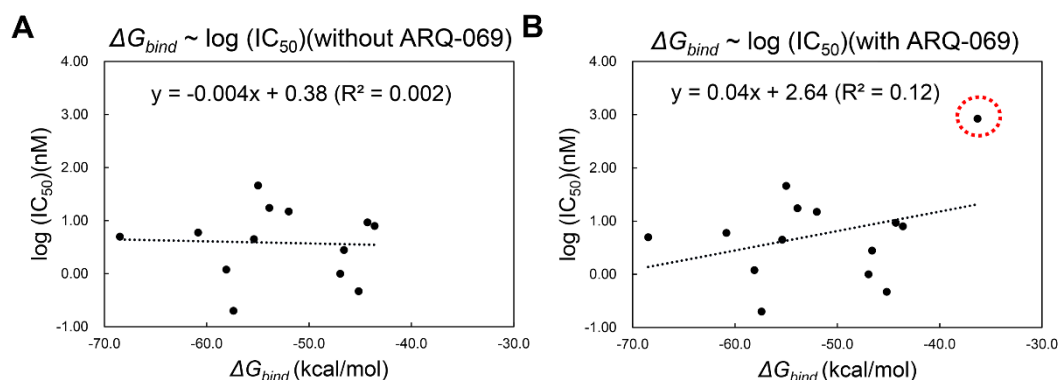

**Figure S6. The addition of a ligand with weaker affinity significantly changed the correlation coefficient between the calculation and experiment results for strong binders. This is a simple demonstration that may explain the different performance of MM/GBSA method reported in literature to some extent. The scatter plot of MM/GBSA and experimental results for strong binders, whose  $IC_{50}$  values against FGFR1 ranges from 0.2 to 50 nM, shows a rather low  $R^2$  correlation coefficient (0.002). (B) The scatter plot of MM/GBSA and experimental results for strong binders plus ARQ-069 (the dot in the circle of red dotted lines), a weak binder with  $IC_{50}$  value of 840 nM, shows a relative higher  $R^2$  correlation coefficient (0.12).  $\Delta G_{bind}$  predicted by MM/GBSA was taken from the lowest  $\Delta G_{bind}$  among all the conformation for each ligand we calculated.**

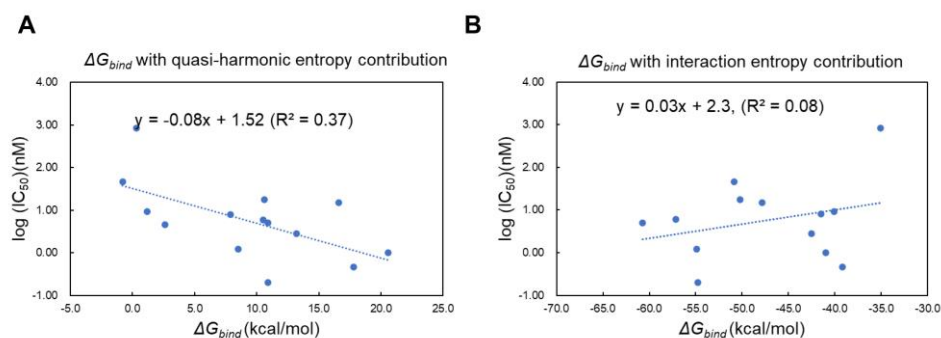

**Figure S7. Including the entropy contribution in MM/GBSA binding energy did not improve the quality of binding affinity prediction for strong binders.** (A) was with the entropy obtained using quasi-harmonic analysis; (B) was with the interaction entropy<sup>1</sup>. Actually, the entropy obtained using quasi-harmonic analysis even made the binding free energy worse.

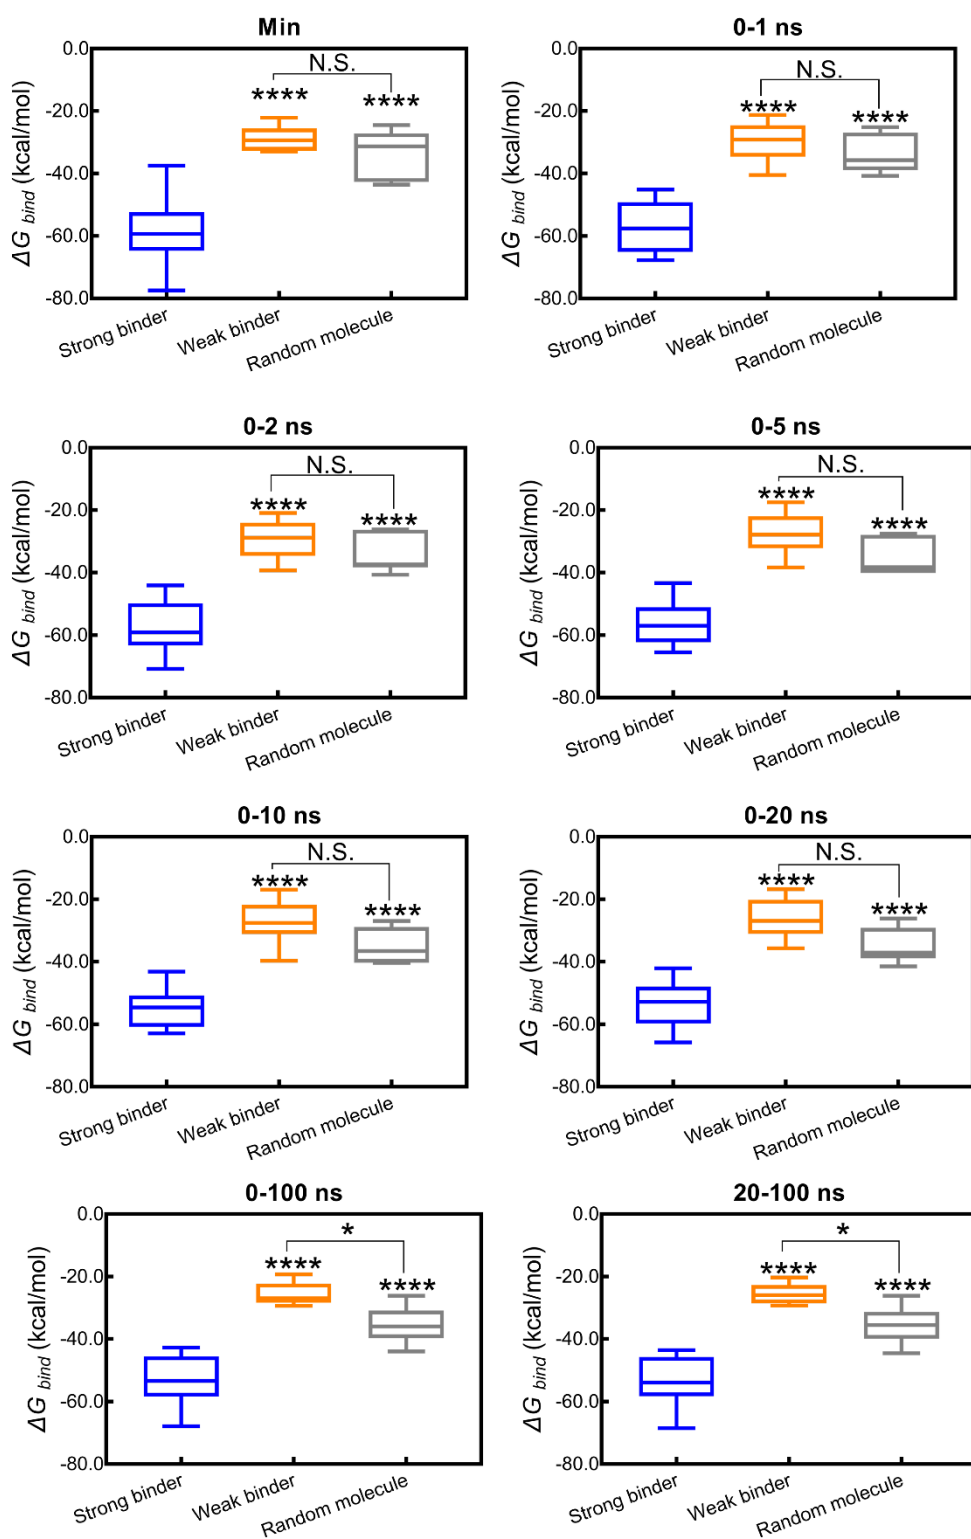

**Figure S8.** The distribution of the MM/GBSA binding free energy for strong binder (blue), weak binder (orange) and random molecule (grey).  $\Delta G_{bind}$  predicted by MM/GBSA was taken from the lowest  $\Delta G_{bind}$  among all the conformation for each



ligand in different timescale MD simulation. “Min” represents the single point MM/GBSA energy obtained based on the starting structure with a quick energy minimization.  $P \geq 0.05$ , N.S.; \*  $P < 0.05$ , \*\*\*\*  $P < 0.0001$  vs. strong binder or as indicated (one-way ANOVA and Tukey’s multiple comparison test).

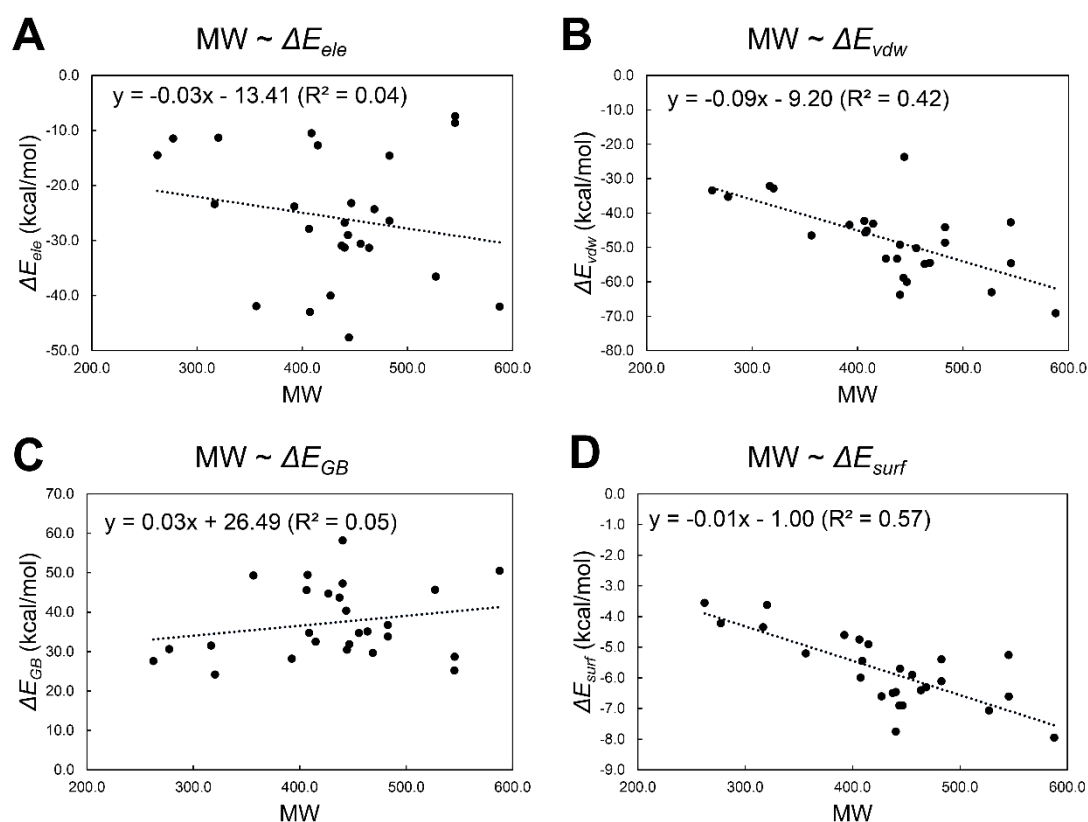

**Figure S9.** The MM/GBSA calculated  $\Delta E_{vdw}$  ( $R^2 = 0.42$ ) and  $\Delta E_{surf}$  ( $R^2 = 0.57$ ) had stronger correlation with molecular weight (MW) of the ligand than that of  $\Delta E_{ele}$  ( $R^2 = 0.04$ ) and  $\Delta E_{GB}$  ( $R^2 = 0.05$ ). (A)  $\Delta E_{ele}$  refers to non-bonded electrostatic energy. (B)  $\Delta E_{vdw}$  means van der Waals energy. (C)  $\Delta E_{GB}$  is implicit polar solvation energy calculated using *GB* model. (D)  $\Delta E_{surf}$  is non-polar solvation energy calculated by the solvent accessible surface area.

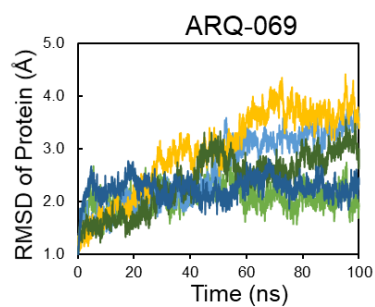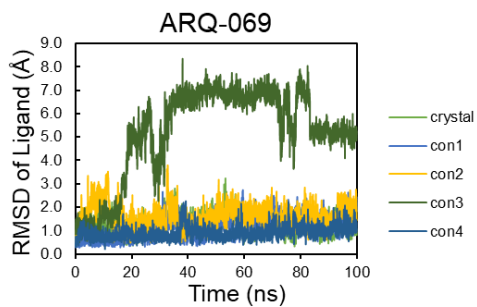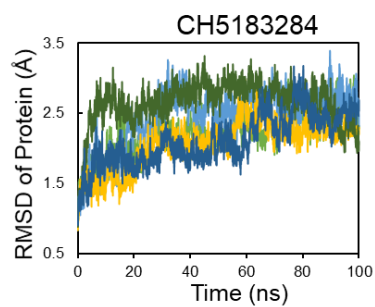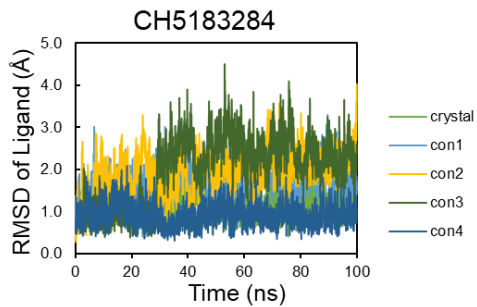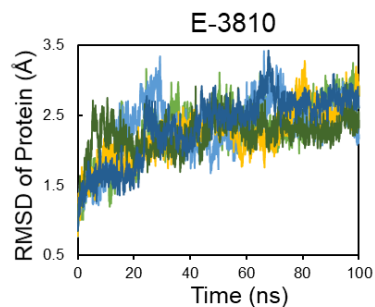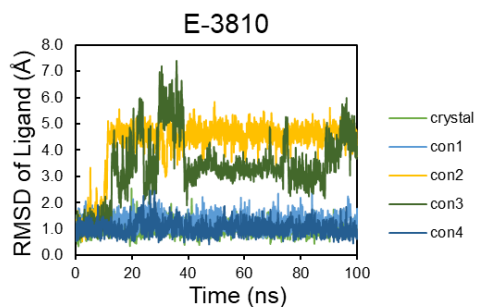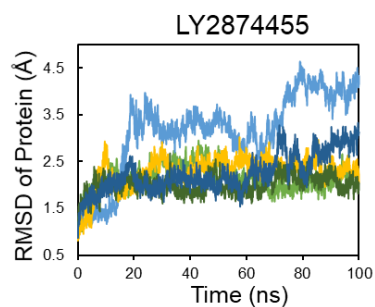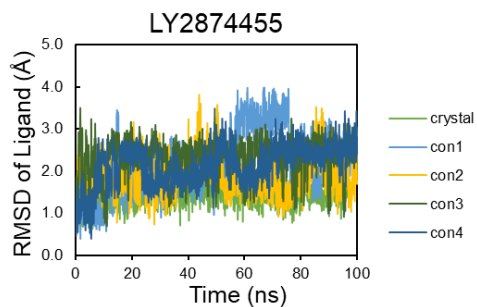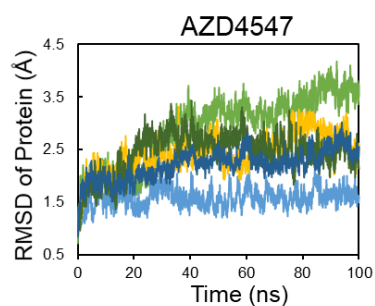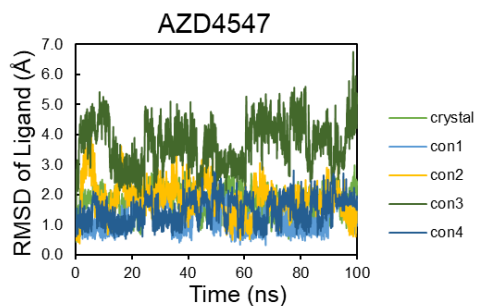

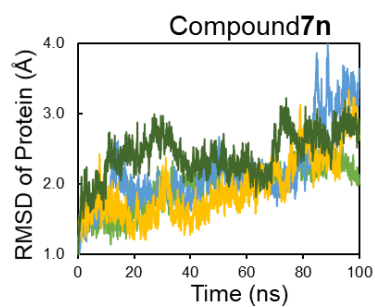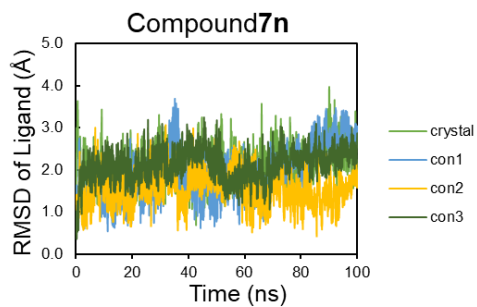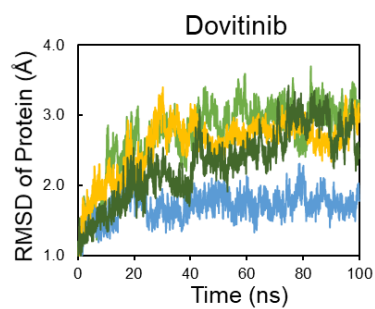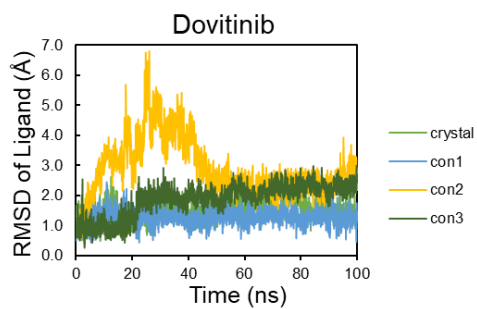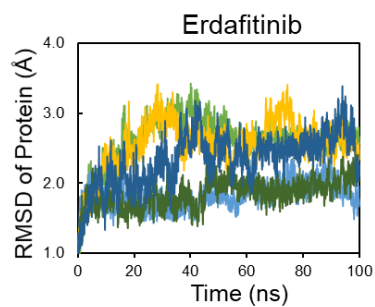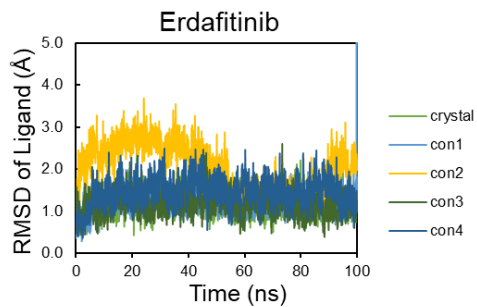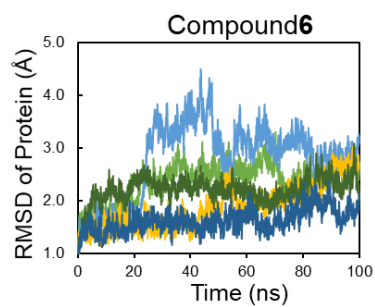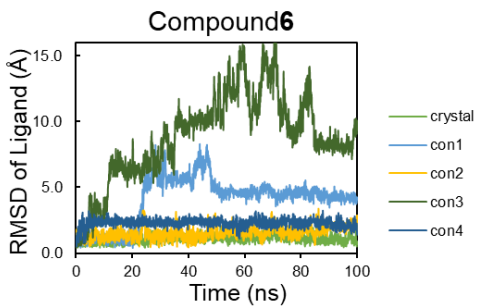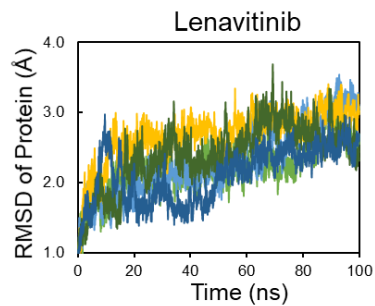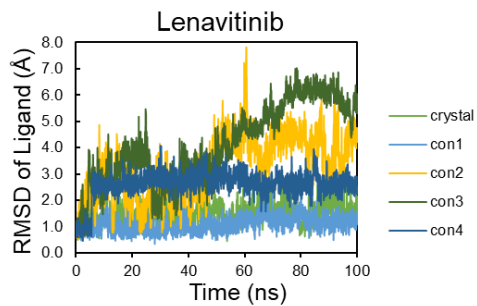

**Figure S10.** The RMSD of protein backbone atoms (C, N, O, C<sub>α</sub>, left panels) and ligand non-hydrogen atoms (right panels) against the starting structure of the 100 ns MD simulation.

## 2. Supplementary Tables

**Table S1.** The MM/GBSA binding free energy of ten ligands owning crystallographic structures. The energy is in unit of kcal/mol, and the RMSD is in Å. Values are reported in form of means  $\pm$  standard deviation. The lowest energy and RMSD values are highlighted in bold (crystal structure not included).

| Ligand<br>conformation | Ligand<br>PDB ID | Docking Method |                   | MM/GBSA                           |                                 |                                 |
|------------------------|------------------|----------------|-------------------|-----------------------------------|---------------------------------|---------------------------------|
|                        |                  | Ranking        | RMSD <sup>A</sup> | $\Delta G_{bind}$                 | RMSD <sup>A</sup>               | RMSD <sup>B</sup>               |
| ARQ-069-crystal        |                  | /              | 0                 | -36.3 $\pm$ 0.5                   | 1.3 $\pm$ 0.4                   | 1.3 $\pm$ 0.4                   |
| ARQ-069-con1           | 3RHX<br>(FGFR1)  | 1(Vina)        | 1.8               | -37.2 $\pm$ 0.5                   | 1.5 $\pm$ 0.4                   | 1.3 $\pm$ 0.5                   |
| ARQ-069-con2           |                  | 6(Vina)        | 4.6               | -26.3 $\pm$ 2.5                   | 4.8 $\pm$ 0.3                   | 1.6 $\pm$ 0.4                   |
| ARQ-069-con3           |                  | 2(Vina)        | 5.7               | -20.2 $\pm$ 4.9                   | 7.2 $\pm$ 0.7                   | 6.1 $\pm$ 1.0                   |
| ARQ-069-con4           |                  | 1(Glide)       | 0.3               | <b>-39.0 <math>\pm</math> 0.5</b> | <b>1.0 <math>\pm</math> 0.4</b> | <b>1.0 <math>\pm</math> 0.3</b> |
| CH5183284-crystal      |                  | /              | 0                 | -44.3 $\pm$ 0.4                   | 0.8 $\pm$ 0.2                   | 1.2 $\pm$ 0.3                   |
| CH5183284-con1         | 5B7V             | 1(Vina)        | 2.5               | <b>-43.6 <math>\pm</math> 2.7</b> | 2.3 $\pm$ 0.2                   | 1.9 $\pm$ 0.4                   |
| CH5183284-con2         | (FGFR1)          | 2(Vina)        | 4.0               | -33.4 $\pm$ 1.7                   | 4.7 $\pm$ 0.6                   | 2.3 $\pm$ 0.7                   |
| CH5183284-con3         |                  | 3(Vina)        | 10.0              | -31.8 $\pm$ 2.3                   | 9.9 $\pm$ 0.2                   | 2.0 $\pm$ 0.5                   |
| CH5183284-con4         |                  | 1(Glide)       | 0.6               | -43.3 $\pm$ 1.2                   | <b>0.9 <math>\pm</math> 0.3</b> | <b>0.9 <math>\pm</math> 0.3</b> |
| E-3810-crystal         |                  | /              | 0                 | -53.9 $\pm$ 1.4                   | 1.5 $\pm$ 0.3                   | 1.0 $\pm$ 0.2                   |
| E-3810-con1            | 4RWL             | 2(Vina)        | 1.3               | <b>-53.7 <math>\pm</math> 0.3</b> | 1.3 $\pm$ 0.3                   | 1.3 $\pm$ 0.3                   |
| E-3810-con2            | (FGFR1)          | 1(Vina)        | 5.2               | -51.5 $\pm$ 1.3                   | 1.5 $\pm$ 0.3                   | 4.6 $\pm$ 0.3                   |
| E-3810-con3            |                  | 3(Vina)        | 9.1               | -32.3 $\pm$ 2.1                   | 10.4 $\pm$ 0.8                  | 3.7 $\pm$ 0.9                   |
| E-3810-con4            |                  | 1(Glide)       | 0.9               | -52.7 $\pm$ 1.8                   | <b>1.2 <math>\pm</math> 0.3</b> | <b>1.1 <math>\pm</math> 0.3</b> |
| LY2874455-crystal      | 5JKG             | /              | 0                 | -46.6 $\pm$ 1.3                   | 1.1 $\pm$ 0.4                   | 1.4 $\pm$ 0.3                   |

|                     |         |          |      |                    |                  |                  |
|---------------------|---------|----------|------|--------------------|------------------|------------------|
| LY2874455-con1      | (FGFR4) | 1(Vina)  | 1.7  | -44.6 ± 1.0        | 1.9 ± 0.7        | 2.4 ± 0.6        |
| LY2874455-con2      |         | 2(Vina)  | 2.0  | <b>-46.5 ± 0.2</b> | 2.0 ± 0.1        | 2.4 ± 0.4        |
| LY2874455-con3      |         | 4(Vina)  | 7.4  | -42.1 ± 3.4        | 7.8 ± 0.2        | <b>1.9 ± 0.5</b> |
| LY2874455-con4      |         | 1(Glide) | 2.2  | -45.0 ± 0.9        | <b>1.5 ± 0.4</b> | 2.2 ± 0.4        |
| AZD4547-crystal     |         | /        | 0    | -57.4 ± 0.7        | 1.6 ± 0.4        | 1.8 ± 0.4        |
| AZD4547-con1        | 4RWK    | 2(Vina)  | 2.0  | -58.3 ± 0.5        | <b>1.5 ± 0.4</b> | <b>1.3 ± 0.5</b> |
| AZD4547-con2        | (FGFR1) | 1(Vina)  | 2.3  | -53.5 ± 1.3        | 2.0 ± 0.4        | 1.8 ± 0.5        |
| AZD4547-con3        |         | 6(Vina)  | 13.3 | -45.5 ± 2.8        | 12.9 ± 0.5       | 3.7 ± 0.7        |
| AZD4547-con4        |         | 1(Glide) | 1.0  | <b>-58.7 ± 0.6</b> | 1.7 ± 0.5        | 1.5 ± 0.5        |
| Compound7n-crystal  |         | /        | 0    | -52.0 ± 1.1        | 1.5 ± 0.3        | 2.2 ± 0.4        |
| Compound7n-con1     | 4ZSA    | 2(Vina)  | 2.4  | -49.1 ± 3.1        | 2.0 ± 0.4        | 2.0 ± 0.6        |
| Compound7n-con2     | (FGFR1) | 1(Vina)  | 3.4  | -43.4 ± 1.0        | 3.1 ± 0.2        | <b>1.6 ± 0.4</b> |
| Compound7n-con3     |         | 1(Glide) | 2.1  | <b>-53.7 ± 1.1</b> | <b>1.6 ± 0.4</b> | 2.2 ± 0.3        |
| Dovitinib-crystal   |         | /        | 0    | -43.6 ± 5.3        | 1.2 ± 0.2        | 1.6 ± 0.4        |
| Dovitinib-con1      | 5AM6    | 2(Vina)  | 1.0  | -39.4 ± 0.5        | <b>1.1 ± 0.2</b> | <b>1.3 ± 0.2</b> |
| Dovitinib-con2      | (FGFR1) | 1(Vina)  | 12.3 | -34.5 ± 5.9        | 15.0 ± 0.7       | 3.0 ± 0.9        |
| Dovitinib-con3      |         | 1(Glide) | 10.6 | <b>-59.2 ± 3.9</b> | 10.1 ± 0.1       | 2.1 ± 0.3        |
| Erdafitinib-crystal |         | /        | 0    | -58.1 ± 1.3        | 0.9 ± 0.2        | 1.2 ± 0.3        |
| Erdafitinib-con1    |         | 1(Vina)  | 1.9  | -57.6 ± 1.0        | 1.9 ± 1.7        | 1.3 ± 1.7        |
| Erdafitinib-con2    | 5EW8    | 2(Vina)  | 2.8  | -56.0 ± 0.5        | 2.8 ± 0.1        | <b>1.2 ± 0.3</b> |
| Erdafitinib-con3    | (FGFR1) | 7(Vina)  | 4.9  | -50.8 ± 2.5        | 5.1 ± 0.1        | 2.0 ± 0.5        |
| Erdafitinib-con4    |         | 1(Glide) | 2.0  | <b>-57.6 ± 0.3</b> | <b>1.3 ± 0.2</b> | 1.5 ± 0.3        |

|                    |         |          |     |                    |                  |                  |
|--------------------|---------|----------|-----|--------------------|------------------|------------------|
| Compound6-crystal  | /       | 0        |     | -28.2 ± 1.0        | 1.4 ± 0.3        | 1.1 ± 0.3        |
| Compound6-con1     | 5Z0S    | 8(Vina)  | 3.7 | -21.3 ± 2.0        | <b>5.5 ± 1.1</b> | 4.9 ± 1.1        |
| Compound6-con2     | (FGFR1) | 2(Vina)  | 4.6 | -12.7 ± 4.8        | 9.9 ± 1.5        | 10.1 ± 2.4       |
| Compound6-con3     |         | 1(Vina)  | 6.8 | -23.6 ± 1.8        | 6.9 ± 0.3        | <b>1.7 ± 0.5</b> |
| Compound6-con4     |         | 1(Glide) | 6.6 | <b>-28.4 ± 0.7</b> | 10.0 ± 0.4       | 2.3 ± 0.3        |
| Lenvatinib-crystal | /       | 0        |     | -55.0 ± 0.4        | 1.3 ± 0.3        | 1.6 ± 0.4        |
| Lenvatinib-con1    |         | 1(Vina)  | 4.3 | -28.7 ± 5.4        | 8.1 ± 1.1        | 4.5 ± 1.4        |
| Lenvatinib-con2    | 5ZV2    | 4(Vina)  | 5.2 | -26.8 ± 4.0        | 7.0 ± 1.3        | 3.5 ± 1.1        |
| Lenvatinib-con3    | (FGFR1) | 2(Vina)  | 5.7 | -36.6 ± 0.3        | 5.4 ± 0.2        | <b>1.1 ± 0.3</b> |
| Lenvatinib-con4    |         | 1(Glide) | 2.5 | <b>-50.0 ± 0.7</b> | <b>1.3 ± 0.2</b> | 2.7 ± 0.3        |

RMSD<sup>A</sup> was calculated against the PDB structure shown in second column.

RMSD<sup>B</sup> was calculated against the starting structure of the production run of MD simulations.

**Table S2.** MM/GBSA correctly predicted the different binding affinity between the chiral enantiomers, ARQ-068 and ARQ-069, while Autodock Vina did not. Values are reported in form of means  $\pm$  standard deviation.  $\Delta G_{bind}$  predicted by MM/GBSA was taken from the lowest  $\Delta G_{bind}$  among all the conformation for ARQ-068 and ARQ-069, respectively.

| Ligand     | IC <sub>50</sub> (nM) for FGFR1 <sup>2</sup> | Autodock Vina                | MM/GBSA                      |                       |
|------------|----------------------------------------------|------------------------------|------------------------------|-----------------------|
|            |                                              | $\Delta G_{bind}$ (kcal/mol) | $\Delta G_{bind}$ (kcal/mol) | RMSD <sup>B</sup> (Å) |
| ARQ-069(S) | 840                                          | -9.0                         | -37.2 $\pm$ 0.5              | 1.3 $\pm$ 0.5         |
| ARQ-068(R) | >30000                                       | -9.2                         | -34.9 $\pm$ 0.9              | 4.5 $\pm$ 0.8         |

In this study, we also encountered a pair of chiral enantiomers, the S enantiomer ARQ-069 and the R enantiomer ARQ-068. The former is active while the latter is not<sup>2</sup>. As shown in Table S2, ARQ-069 was predicted to have lower  $\Delta G_{bind}$  with stable conformation during the MD, while ARQ-068 was unstable during the MD simulation, given the large RMSD<sup>B</sup> value of the compound.



**Table S3.** The detailed information of compounds considered in this study.

| Molecular Name                                    | Structure                                                                            | Molecular Weight | Bioactivity on FGFR1                    |
|---------------------------------------------------|--------------------------------------------------------------------------------------|------------------|-----------------------------------------|
| <b>Strong binders</b>                             |                                                                                      |                  |                                         |
| CH5183284<br>(5B7V <sup>3</sup> , LWJ; FGFR1 3mu) | 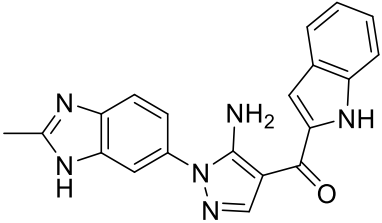    | 356.4            | IC <sub>50</sub> = 9.3 nM <sup>3</sup>  |
| E-3810<br>(4RWL <sup>4</sup> , 3ZC; FGFR1 3mu)    |     | 443.5            | IC <sub>50</sub> = 17.5 nM <sup>5</sup> |
| LY2874455<br>(5JJK <sup>6</sup> , 6LF; FGFR4 WT)  |  | 444.3            | IC <sub>50</sub> = 7.7 nM <sup>7</sup>  |

|                                                                      |                                                                                     |              |                                             |
|----------------------------------------------------------------------|-------------------------------------------------------------------------------------|--------------|---------------------------------------------|
| <p>AZD4547<br/>(4RWK<sup>4</sup>, 66T; FGFR1<br/>3mu)</p>            | 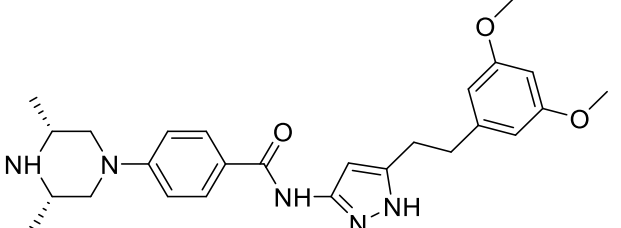  | <p>463.6</p> | <p>IC<sub>50</sub> = 0.2 nM<sup>8</sup></p> |
| <p>Compound <b>7n</b><br/>(4ZSA<sup>9</sup>, 4UT; FGFR1<br/>2mu)</p> |   | <p>455.6</p> | <p>IC<sub>50</sub> = 15 nM<sup>9</sup></p>  |
| <p>Dovitinib<br/>(5AM6<sup>10</sup>, 38O; FGFR1<br/>WT)</p>          |  | <p>392.4</p> | <p>IC<sub>50</sub> = 8 nM<sup>11</sup></p>  |

|                                                               |                                                                                                                                                                                                                                                                                                                                                                                                                                                                                                                                              |              |                                              |
|---------------------------------------------------------------|----------------------------------------------------------------------------------------------------------------------------------------------------------------------------------------------------------------------------------------------------------------------------------------------------------------------------------------------------------------------------------------------------------------------------------------------------------------------------------------------------------------------------------------------|--------------|----------------------------------------------|
| <p>Erdafitinib<br/>(5EW8<sup>12</sup>, 5SF; FGFR1<br/>WT)</p> | 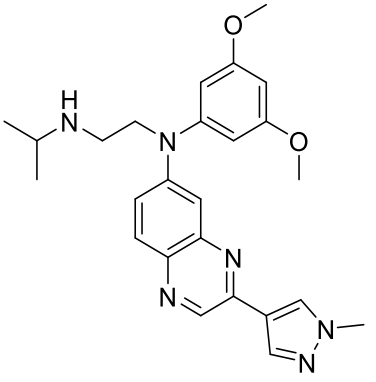 <p>The structure of Erdafitinib features a central benzimidazole ring system. One of the benzimidazole nitrogens is substituted with a 3,4,5-trimethoxyphenyl group. The other nitrogen is substituted with a 2-(isobutylamino)ethyl group. The 2-position of the benzimidazole ring is substituted with a 1-methyl-1H-imidazole-4-ylmethyl group.</p>                                                                                                     | <p>446.6</p> | <p>IC<sub>50</sub> = 1.2 nM<sup>13</sup></p> |
| <p>Lenvatinib<br/>(5ZV2<sup>14</sup>, LEV; FGFR1<br/>1mu)</p> |  <p>The structure of Lenvatinib consists of a benzimidazole core. The 2-position of the benzimidazole ring is substituted with a 4-chlorophenyl group, which is further substituted at the para position with a cyclopropylcarbamoyl group (-NH-CO-NH-cyclopropyl). The 5-position of the benzimidazole ring is substituted with a 4-amino-2-methoxyphenyl group (-NH<sub>2</sub> and -OCH<sub>3</sub> at the para and ortho positions, respectively).</p> | <p>426.9</p> | <p>IC<sub>50</sub> = 46 nM<sup>15</sup></p>  |

|              |                                                                                     |       |                                  |
|--------------|-------------------------------------------------------------------------------------|-------|----------------------------------|
| E-7090       | 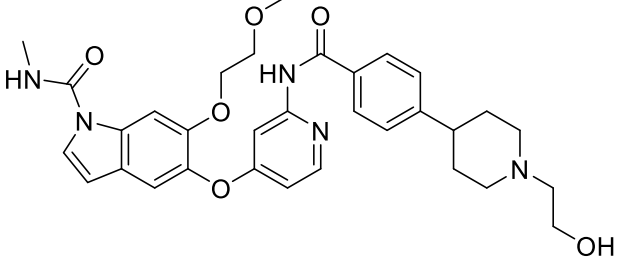  | 587.7 | $IC_{50} = 5 \text{ nM}^{16}$    |
| ASP-5878     |   | 407.4 | $IC_{50} = 0.47 \text{ nM}^{17}$ |
| WO2013129369 |  | 437.4 | $IC_{50} = 1 \text{ nM}^{18}$    |

|                     |                                                                                    |       |                                                                            |
|---------------------|------------------------------------------------------------------------------------|-------|----------------------------------------------------------------------------|
| WO2014139465        | 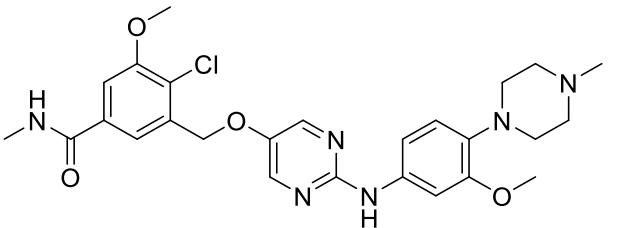 | 527.0 | IC <sub>50</sub> = 6 nM <sup>19</sup>                                      |
| ARQ-087             |   | 468.6 | IC <sub>50</sub> = 4.5 <sup>20</sup>                                       |
| <b>Weak binders</b> |                                                                                    |       |                                                                            |
| IJMS-6              |  | 262.3 | FGFR1 inhibition (%) at 10 μM=19.65<br>FGFR1 inhibition (%) at 50 μM=59.20 |

|         |                                                                                     |       |                                                                                                     |
|---------|-------------------------------------------------------------------------------------|-------|-----------------------------------------------------------------------------------------------------|
| IJMS-42 | 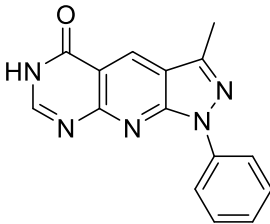   | 277.3 | FGFR1 inhibition (%) at 10 $\mu$ M=28.25<br>FGFR1 inhibition (%) at 50 $\mu$ M=54.20                |
| IJMS-92 |    | 316.7 | FGFR1 inhibition (%) at 10 $\mu$ M=15.75<br>FGFR1 inhibition (%) at 50 $\mu$ M=57.10                |
| IJMS-96 |   | 320.3 | FGFR1 inhibition (%) at 10 $\mu$ M=2.80<br>FGFR1 inhibition (%) at 50 $\mu$ M=83.70                 |
| IJMS-99 |  | 406.4 | FGFR1 inhibition (%) at 10 $\mu$ M=27.45<br>FGFR1 inhibition (%) at 50 $\mu$ M =52.30 <sup>21</sup> |

|                                                              |                                                                                     |              |                                                        |
|--------------------------------------------------------------|-------------------------------------------------------------------------------------|--------------|--------------------------------------------------------|
| <p>Compound6<br/>(5Z0S<sup>22</sup>, 960; FGFR1<br/>2mu)</p> | 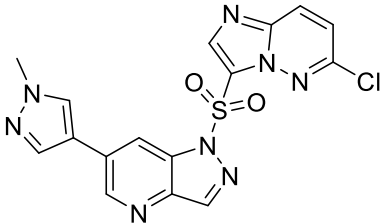   | <p>414.8</p> | <p>FGFR1 inhibition (%) at 10 μM=80.1<sup>22</sup></p> |
| <p><b>Random molecules</b></p>                               |                                                                                     |              |                                                        |
| <p>ZINC17342632</p>                                          |   | <p>408.9</p> | <p>/</p>                                               |
| <p>ZINC2542634</p>                                           |   | <p>440.2</p> | <p>/</p>                                               |
| <p>ZINC33357190</p>                                          |  | <p>440.2</p> | <p>/</p>                                               |

|                           |                                                                                     |       |   |
|---------------------------|-------------------------------------------------------------------------------------|-------|---|
| ZINC3510461               | 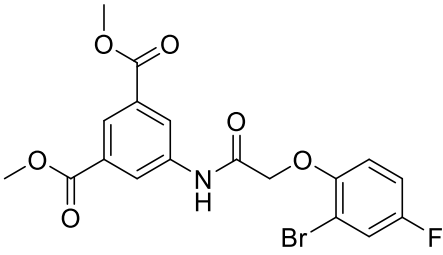   | 482.8 | / |
| ZINC40583292              |   | 482.8 | / |
| ZINC49405771              |    | 545.3 | / |
| ZINC71886989              |  | 545.4 | / |
| <b>Chiral enantiomers</b> |                                                                                     |       |   |



|                                                            |                                                                                   |              |                                               |
|------------------------------------------------------------|-----------------------------------------------------------------------------------|--------------|-----------------------------------------------|
| <p>ARQ-069<br/>(3RHX<sup>23</sup>, 3RH; FGFR1<br/>2mu)</p> | 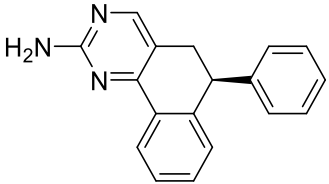 | <p>273.3</p> | <p>IC<sub>50</sub> = 840 nM<sup>23</sup></p>  |
| <p>ARQ-068</p>                                             |  | <p>273.3</p> | <p>IC<sub>50</sub> &gt; 3 μM<sup>23</sup></p> |

**Table S4.** The  $\Delta G_{bind}$  calculated using MM/GBSA based on different timescales of MD simulation. Values are reported in form of means  $\pm$  standard deviation. The error bars for 0-100 ns and 20-100 ns results were calculated using the standard deviation of the values of 0-20 ns, 20-40 ns, 40-60 ns, 60-80 ns and 80-100 ns MD simulation. Unit: kcal/mol.

|                   | Min   | 0-1 ns          | 0-2 ns          | 0-5 ns          | 0-10 ns         | 0-20 ns         | 20-40 ns        | 40-60 ns        | 60-80 ns        | 80-100 ns       | 0-100 ns        | 20-100 ns       |
|-------------------|-------|-----------------|-----------------|-----------------|-----------------|-----------------|-----------------|-----------------|-----------------|-----------------|-----------------|-----------------|
| ARQ-069-crystal   | -47.3 | -40.4 $\pm$ 1.5 | -38.2 $\pm$ 2.7 | -38.5 $\pm$ 2.5 | -37.7 $\pm$ 2.2 | -36.6 $\pm$ 2.7 | -37.0 $\pm$ 2.5 | -36.3 $\pm$ 2.4 | -35.8 $\pm$ 2.6 | -36.0 $\pm$ 2.7 | -36.3 $\pm$ 0.5 | -36.3 $\pm$ 0.5 |
| ARQ-069-con1      | -43.4 | -49.1 $\pm$ 2.7 | -49.5 $\pm$ 3.1 | -47.8 $\pm$ 3.5 | -46.7 $\pm$ 3.2 | -44.7 $\pm$ 4.1 | -37.2 $\pm$ 3.2 | -37.0 $\pm$ 8.2 | -36.6 $\pm$ 2.6 | -37.9 $\pm$ 2.7 | -38.7 $\pm$ 3.4 | -37.2 $\pm$ 0.5 |
| ARQ-069-con2      | -23.2 | -31.3 $\pm$ 1.9 | -31.8 $\pm$ 1.8 | -31.2 $\pm$ 3.0 | -29.0 $\pm$ 3.0 | -28.7 $\pm$ 3.2 | -29.7 $\pm$ 3.2 | -25.4 $\pm$ 4.0 | -26.1 $\pm$ 3.8 | -23.9 $\pm$ 3.5 | -26.7 $\pm$ 2.4 | -26.3 $\pm$ 2.5 |
| ARQ-069-con3      | -26.0 | -30.5 $\pm$ 2.0 | -29.9 $\pm$ 2.4 | -26.9 $\pm$ 3.8 | -25.2 $\pm$ 3.7 | -24.4 $\pm$ 3.5 | -17.9 $\pm$ 4.6 | -17.3 $\pm$ 2.7 | -17.9 $\pm$ 2.1 | -27.5 $\pm$ 4.4 | -21.0 $\pm$ 4.6 | -20.2 $\pm$ 4.9 |
| ARQ-069-con4      | -47.7 | -43.9 $\pm$ 2.9 | -44.8 $\pm$ 2.8 | -46.9 $\pm$ 3.3 | -46.4 $\pm$ 2.9 | -42.8 $\pm$ 4.7 | -39.7 $\pm$ 2.6 | -38.8 $\pm$ 3.1 | -38.6 $\pm$ 2.8 | -38.8 $\pm$ 3.0 | -39.7 $\pm$ 1.8 | -39.0 $\pm$ 0.5 |
| CH5183284-crystal | -51.2 | -47.0 $\pm$ 2.6 | -46.5 $\pm$ 2.7 | -44.7 $\pm$ 3.3 | -45.3 $\pm$ 3.2 | -44.9 $\pm$ 3.2 | -44.8 $\pm$ 3.1 | -44.1 $\pm$ 3.2 | -43.8 $\pm$ 2.8 | -44.5 $\pm$ 3.6 | -44.4 $\pm$ 0.5 | -44.3 $\pm$ 0.4 |
| CH5183284-con1    | -39.9 | -42.3 $\pm$ 3.1 | -40.6 $\pm$ 4.2 | -39.4 $\pm$ 3.6 | -38.2 $\pm$ 3.5 | -37.6 $\pm$ 3.4 | -47.3 $\pm$ 7.3 | -42.5 $\pm$ 4.1 | -43.6 $\pm$ 4.4 | -40.9 $\pm$ 4.8 | -42.4 $\pm$ 3.6 | -43.6 $\pm$ 2.7 |
| CH5183284-con2    | -27.3 | -39.0 $\pm$ 2.5 | -39.2 $\pm$ 1.8 | -38.2 $\pm$ 3.1 | -37.4 $\pm$ 3.2 | -37.0 $\pm$ 4.2 | -32.7 $\pm$ 3.4 | -34.5 $\pm$ 3.1 | -29.6 $\pm$ 3.6 | -30.4 $\pm$ 3.5 | -32.8 $\pm$ 3.0 | -31.8 $\pm$ 2.3 |
| CH5183284-con3    | -36.9 | -33.6 $\pm$ 2.5 | -34.8 $\pm$ 2.7 | -34.7 $\pm$ 4.0 | -35.4 $\pm$ 4.3 | -35.3 $\pm$ 4.8 | -31.6 $\pm$ 4.3 | -32.9 $\pm$ 4.4 | -33.4 $\pm$ 4.1 | -35.7 $\pm$ 2.9 | -33.8 $\pm$ 1.7 | -33.4 $\pm$ 1.7 |
| CH5183284-con4    | -52.4 | -43 $\pm$ 2.7   | -41.0 $\pm$ 3.3 | -41.0 $\pm$ 3.8 | -42.3 $\pm$ 2.4 | -41.5 $\pm$ 2.6 | -44.8 $\pm$ 3.5 | -43.1 $\pm$ 3.3 | -41.9 $\pm$ 3.2 | -43.6 $\pm$ 3.5 | -43 $\pm$ 1.3   | -43.3 $\pm$ 1.2 |
| E-3810-crystal    | -58.7 | -51.3 $\pm$ 4.9 | -51.3 $\pm$ 4.1 | -51.6 $\pm$ 3.7 | -50.6 $\pm$ 4.2 | -50.4 $\pm$ 4.3 | -51.8 $\pm$ 3.9 | -54.0 $\pm$ 3.3 | -54.7 $\pm$ 4.1 | -55.1 $\pm$ 4.5 | -53.2 $\pm$ 2.0 | -53.9 $\pm$ 1.4 |
| E-3810-con1       | -56.0 | -52.5 $\pm$ 3.4 | -53.5 $\pm$ 3.0 | -52.4 $\pm$ 3.4 | -51.9 $\pm$ 3.9 | -52.5 $\pm$ 4.2 | -53.9 $\pm$ 3.3 | -53.6 $\pm$ 3.4 | -53.9 $\pm$ 3.5 | -53.3 $\pm$ 2.7 | -53.4 $\pm$ 0.6 | -53.7 $\pm$ 0.3 |
| E-3810-con2       | -53.6 | -44.4 $\pm$ 1.3 | -44.7 $\pm$ 1.7 | -44.3 $\pm$ 3.4 | -43.3 $\pm$ 3.6 | -48.4 $\pm$ 6.8 | -51.1 $\pm$ 4.0 | -52.5 $\pm$ 4.2 | -49.8 $\pm$ 4.0 | -52.5 $\pm$ 3.5 | -50.9 $\pm$ 1.8 | -51.5 $\pm$ 1.3 |
| E-3810-con3       | -45.6 | -33.3 $\pm$ 5.6 | -36.2 $\pm$ 6.0 | -35.1 $\pm$ 7.6 | -35.5 $\pm$ 5.7 | -34.7 $\pm$ 5.9 | -32.6 $\pm$ 5.0 | -34.9 $\pm$ 3.8 | -31.8 $\pm$ 5.6 | -29.8 $\pm$ 4.6 | -32.8 $\pm$ 2.1 | -32.3 $\pm$ 2.1 |
| E-3810-con4       | -61.3 | -52.3 $\pm$ 3.4 | -53.1 $\pm$ 3.8 | -53.1 $\pm$ 3.8 | -51.6 $\pm$ 4.2 | -51.4 $\pm$ 4.1 | -50.5 $\pm$ 4.1 | -52.1 $\pm$ 4.6 | -54.6 $\pm$ 2.9 | -53.7 $\pm$ 3.8 | -52.5 $\pm$ 1.7 | -52.7 $\pm$ 1.8 |
| LY2874455-crystal | -50.7 | -41.9 $\pm$ 3.2 | -43.0 $\pm$ 4.3 | -43.8 $\pm$ 3.5 | -43.4 $\pm$ 3.5 | -44.3 $\pm$ 3.5 | -46.9 $\pm$ 3.0 | -44.7 $\pm$ 3.5 | -46.9 $\pm$ 3.5 | -47.7 $\pm$ 3.0 | -46.1 $\pm$ 1.5 | -46.6 $\pm$ 1.3 |
| LY2874455-con1    | -44.7 | -44.1 $\pm$ 2.8 | -44.2 $\pm$ 2.8 | -43.4 $\pm$ 3.1 | -42.7 $\pm$ 2.9 | -44.1 $\pm$ 3.7 | -43.9 $\pm$ 3.8 | -43.7 $\pm$ 3.0 | -44.6 $\pm$ 3.2 | -46.0 $\pm$ 3.7 | -44.5 $\pm$ 0.9 | -44.6 $\pm$ 1.0 |
| LY2874455-con2    | -46.4 | -57.6 $\pm$ 3.4 | -60.1 $\pm$ 4.2 | -60.0 $\pm$ 3.2 | -59.5 $\pm$ 2.5 | -58.5 $\pm$ 3.3 | -45.3 $\pm$ 7.4 | -37.3 $\pm$ 5.8 | -43.4 $\pm$ 3.9 | -42.4 $\pm$ 4.6 | -45.4 $\pm$ 7.9 | -42.1 $\pm$ 3.4 |
| LY2874455-con3    | -45.1 | -47.6 $\pm$ 3.8 | -45.6 $\pm$ 4.0 | -44.6 $\pm$ 3.2 | -45.1 $\pm$ 3.5 | -45.9 $\pm$ 3.7 | -46.7 $\pm$ 4.2 | -46.7 $\pm$ 3.7 | -46.4 $\pm$ 3.5 | -46.2 $\pm$ 3.1 | -46.4 $\pm$ 0.4 | -46.5 $\pm$ 0.2 |

|                     |       |             |             |             |              |              |             |              |             |             |             |             |
|---------------------|-------|-------------|-------------|-------------|--------------|--------------|-------------|--------------|-------------|-------------|-------------|-------------|
| LY2874455-con4      | -47.6 | -49.9 ± 3.1 | -50.3 ± 2.5 | -50.9 ± 2.4 | -48.1 ± 3.9  | -46.5 ± 4.0  | -45.0 ± 3.2 | -44.1 ± 3.2  | -44.7 ± 3.4 | -46.3 ± 3.1 | -45.3 ± 1.0 | -45.0 ± 0.9 |
| AZD4547-crystal     | -68.6 | -62.4 ± 1.8 | -60.4 ± 3.4 | -58.5 ± 3.9 | -58.6 ± 3.4  | -59.1 ± 3.4  | -56.4 ± 3.3 | -57.9 ± 3.1  | -57.6 ± 3.8 | -57.8 ± 3.6 | -57.8 ± 1.0 | -57.4 ± 0.7 |
| AZD4547-con1        | -61.4 | -60.1 ± 1.9 | -58.7 ± 4.1 | -59.2 ± 3.7 | -58.3 ± 3.8  | -57.4 ± 3.9  | -58.6 ± 4.2 | -58.1 ± 3.5  | -58.7 ± 4.5 | -57.7 ± 4.2 | -58.1 ± 0.6 | -58.3 ± 0.5 |
| AZD4547-con2        | -58.1 | -67.0 ± 3.9 | -67.0 ± 3.8 | -64.5 ± 4.3 | -62.9 ± 5.1  | -59.9 ± 5.4  | -53.1 ± 3.1 | -55.4 ± 3.6  | -52.3 ± 4.5 | -53.2 ± 3.4 | -54.8 ± 3.1 | -53.5 ± 1.3 |
| AZD4547-con3        | -53.8 | -46.2 ± 2.3 | -42.5 ± 6.6 | -41.6 ± 5.2 | -41.4 ± 5.3  | -41.7 ± 5.1  | -42.9 ± 4.5 | -44.8 ± 3.9  | -44.7 ± 5.5 | -49.5 ± 6.4 | -44.7 ± 3.0 | -45.5 ± 2.8 |
| AZD4547-con4        | -68.6 | -65.8 ± 0.8 | -64.1 ± 4.2 | -60.0 ± 5.5 | -58.8 ± 5.6  | -59.4 ± 4.6  | -58.6 ± 4.1 | -59.5 ± 3.6  | -58.4 ± 3.6 | -58.2 ± 4.1 | -58.8 ± 0.6 | -58.7 ± 0.6 |
| Compound7n-crystal  | -59.1 | -47.1 ± 3.6 | -50.4 ± 4.5 | -51.9 ± 4.6 | -53.4 ± 5.0  | -52.8 ± 4.7  | -53.4 ± 4.3 | -50.9 ± 4.1  | -51.4 ± 3.9 | -52.3 ± 3.7 | -52.2 ± 1.0 | -52.0 ± 1.1 |
| Compound7n-con1     | -55.7 | -52.9 ± 3.5 | -53.9 ± 3.4 | -53.3 ± 4.1 | -52.0 ± 3.9  | -50.9 ± 4.6  | -50.9 ± 4.8 | -50.9 ± 4.2  | -50.2 ± 3.9 | -44.4 ± 3.9 | -49.4 ± 2.8 | -49.1 ± 3.1 |
| Compound7n-con2     | -59.3 | -44.7 ± 2.2 | -43.4 ± 2.9 | -44.7 ± 3.6 | -44.4 ± 3.5  | -45.9 ± 3.5  | -43.9 ± 3.9 | -42.0 ± 3.3  | -43.4 ± 3.9 | -44.3 ± 4.2 | -43.9 ± 1.4 | -43.4 ± 1.0 |
| Compound7n-con3     | -66.4 | -65.1 ± 4.2 | -60.9 ± 7.2 | -57.0 ± 6.9 | -55.7 ± 5.6  | -54.4 ± 5.2  | -54.7 ± 4.1 | -53.7 ± 5.4  | -54.2 ± 4.2 | -52.2 ± 4.6 | -53.8 ± 1   | -53.7 ± 1.1 |
| Dovitinib-crystal   | -35.8 | -36.7 ± 2.4 | -37.2 ± 2.3 | -37.9 ± 2.5 | -38.5 ± 2.1  | -39.3 ± 1.9  | -38.2 ± 2.6 | -42.2 ± 2.7  | -43.2 ± 2.3 | -50.9 ± 4.2 | -42.8 ± 5.0 | -43.6 ± 5.3 |
| Dovitinib-con1      | -34.0 | -38.4 ± 3.6 | -37.2 ± 3.1 | -37.7 ± 3.3 | -38.0 ± 4.4  | -38.6 ± 4.6  | -40.0 ± 5.1 | -39.0 ± 3.5  | -38.9 ± 3.0 | -39.6 ± 5.1 | -39.2 ± 0.6 | -39.4 ± 0.5 |
| Dovitinib-con2      | -37.5 | -63.1 ± 4.5 | -62.5 ± 4.0 | -60.2 ± 5.2 | -54.6 ± 2.7  | -42.1 ± 2.9  | -26.9 ± 2.7 | -33.6 ± 4.2  | -41.2 ± 4.1 | -36.4 ± 3.9 | -36.0 ± 6.2 | -34.5 ± 5.9 |
| Dovitinib-con3      | -68.0 | -66.8 ± 6.5 | -66.2 ± 5.0 | -66.0 ± 4.9 | -67.5 ± 3.5  | -65.4 ± 5.2  | -53.7 ± 5.4 | -59.2 ± 10.1 | -61.8 ± 4.8 | -62 ± 4.9   | -60.4 ± 4.4 | -59.2 ± 3.9 |
| Erdafitinib-crystal | -62.7 | -64.3 ± 1.9 | -63.3 ± 2.2 | -64.3 ± 2.9 | -62.1 ± 2.7  | -60.5 ± 3.0  | -56.5 ± 2.8 | -57.7 ± 3.7  | -59.0 ± 4.1 | -59.3 ± 6.6 | -58.6 ± 1.5 | -58.1 ± 1.3 |
| Erdafitinib-con1    | -77.4 | -67.7 ± 4.0 | -63.9 ± 5.3 | -60.0 ± 6.3 | -62.1 ± 2.9  | -59.6 ± 3.0  | -56.5 ± 2.7 | -57.8 ± 2.9  | -57.4 ± 2.7 | -58.8 ± 3.4 | -58.0 ± 1.2 | -57.6 ± 1.0 |
| Erdafitinib-con2    | -50.8 | -57.2 ± 5.3 | -54.3 ± 5.4 | -48.5 ± 6.2 | -47.5 ± 10.6 | -49.1 ± 16.0 | -48.6 ± 6.5 | -49.7 ± 7.5  | -54.4 ± 4.5 | -50.4 ± 7.8 | -50.5 ± 2.3 | -50.8 ± 2.5 |
| Erdafitinib-con3    | -68.9 | -55.7 ± 3.9 | -54.9 ± 3.8 | -56.3 ± 3.4 | -56.3 ± 3.8  | -56.8 ± 3.4  | -55.2 ± 3.7 | -56.3 ± 3.9  | -56.0 ± 4.1 | -56.4 ± 4.2 | -56.1 ± 0.6 | -56.0 ± 0.5 |
| Erdafitinib-con4    | -67.2 | -66.0 ± 3.0 | -67.5 ± 3.5 | -67.1 ± 3.9 | -63.5 ± 6.3  | -60.7 ± 6.0  | -57.3 ± 3.3 | -57.5 ± 3.6  | -57.4 ± 3.4 | -58.1 ± 3.5 | -58.2 ± 1.4 | -57.6 ± 0.3 |
| Compound6-crystal   | -31.2 | -28.6 ± 2.0 | -28.1 ± 1.8 | -27.6 ± 2.1 | -27.1 ± 4.5  | -26.9 ± 4.1  | -27.7 ± 3.4 | -28.7 ± 3.8  | -27.1 ± 4   | -29.3 ± 4.3 | -27.9 ± 1.0 | -28.2 ± 1.0 |
| Compound6-con1      | -22.3 | -32.7 ± 2.7 | -33.1 ± 3.2 | -29.0 ± 4.9 | -27.4 ± 5.3  | -24.6 ± 4.5  | -18.7 ± 3.6 | -21.6 ± 3.1  | -21.1 ± 3.1 | -23.6 ± 3.7 | -21.9 ± 2.3 | -21.2 ± 2.0 |

|                    |       |             |             |             |              |             |             |             |             |             |             |             |
|--------------------|-------|-------------|-------------|-------------|--------------|-------------|-------------|-------------|-------------|-------------|-------------|-------------|
| Compound6-con2     | -25.1 | -22.7 ± 2.1 | -22.6 ± 2.3 | -22.0 ± 2.4 | -21.7 ± 5.1  | -22.8 ± 5.4 | -21.6 ± 4.0 | -23.5 ± 4.3 | -23.3 ± 3.4 | -25.9 ± 4.1 | -23.4 ± 1.6 | -23.6 ± 1.8 |
| Compound6-con3     | -20.8 | -18.0 ± 2.2 | -18.2 ± 2.3 | -19.0 ± 4.1 | -17.6 ± 3.8  | -16.9 ± 4.2 | -16.5 ± 4.9 | -16.3 ± 6.5 | -6.2 ± 3.0  | -11.9 ± 4.3 | -13.6 ± 4.6 | -12.7 ± 4.8 |
| Compound6-con4     | -28.8 | -28 ± 2.2   | -26.6 ± 3.0 | -26.0 ± 3.4 | -27.0 ± 3.3  | -28.3 ± 3.7 | -29.2 ± 2.4 | -28.2 ± 3.4 | -27.6 ± 3.3 | -28.6 ± 3.3 | -28.4 ± 0.6 | -28.4 ± 0.7 |
| Lenvatinib-crystal | -59.5 | -58.7 ± 5.2 | -61.2 ± 4.7 | -57.0 ± 5.4 | -56.5 ± 4.4  | -55.5 ± 4.2 | -55.1 ± 3.2 | -54.5 ± 3.1 | -55.3 ± 3.7 | -55.3 ± 4.5 | -55.1 ± 0.4 | -55.0 ± 0.4 |
| Lenvatinib-con1    | -37.9 | -37.7 ± 3.4 | -37.0 ± 3.8 | -36.4 ± 3.2 | -35.6 ± 3.2  | -35.7 ± 3.6 | -36.5 ± 3.7 | -36.2 ± 3.3 | -36.8 ± 3.5 | -36.7 ± 3.1 | -36.4 ± 0.5 | -36.6 ± 0.3 |
| Lenvatinib-con2    | -28.6 | -37.6 ± 1.5 | -36.3 ± 3.7 | -33.5 ± 5.0 | -31.8 ± 5.1  | -30.6 ± 5.1 | -32.7 ± 3.7 | -25.3 ± 5.8 | -24.3 ± 4.4 | -24.7 ± 3.7 | -27.5 ± 3.9 | -26.7 ± 4.0 |
| Lenvatinib-con3    | -37.6 | -30.3 ± 3.2 | -30.9 ± 4.0 | -28.2 ± 4.3 | -26.4 ± 4.2  | -24.7 ± 4.2 | -24.3 ± 3.8 | -25.2 ± 3.1 | -29.2 ± 4.8 | -36.0 ± 3.7 | -27.9 ± 5.0 | -28.7 ± 5.4 |
| Lenvatinib-con4    | -41.9 | -34.1 ± 2.2 | -34.3 ± 3.4 | -34.0 ± 3.5 | -40.5 ± 8.6  | -45.4 ± 8.1 | -50.6 ± 3.8 | -49.7 ± 4.6 | -50.4 ± 4   | -49.1 ± 4.9 | -49 ± 2.1   | -49.9 ± 0.7 |
| ASP-5878-con1      | -60.8 | -45.2 ± 2.7 | -44.1 ± 2.9 | -43.4 ± 3.2 | -43.2 ± 3.5  | -44.0 ± 3.4 | -44.3 ± 4.5 | -44.2 ± 2.9 | -46.0 ± 3.4 | -45.2 ± 4.3 | -44.7 ± 0.8 | -44.9 ± 0.8 |
| ASP-5878-con2      | -45.0 | -31.7 ± 4.1 | -32.0 ± 3.0 | -37.3 ± 7.6 | -40.1 ± 7.0  | -42.0 ± 6.0 | -44.1 ± 5.5 | -44.9 ± 4.4 | -45.0 ± 3.6 | -46.7 ± 3.4 | -44.5 ± 1.7 | -45.2 ± 1.1 |
| ASP-5878-con3      | -43.4 | -33.3 ± 3.4 | -34.5 ± 3.2 | -35.0 ± 3.2 | -33.4 ± 3.0  | -32.0 ± 3.4 | -34.1 ± 3.9 | -37.9 ± 3.6 | -36.6 ± 3.0 | -36.7 ± 3.6 | -35.5 ± 2.4 | -36.3 ± 1.6 |
| E-7090-con1        | -49.4 | -52.4 ± 3.4 | -54.0 ± 3.2 | -56.2 ± 4.7 | -55.0 ± 5.3  | -55.6 ± 5.5 | -52.0 ± 5.8 | -51.0 ± 7.8 | -49.1 ± 7.4 | -48.8 ± 5.0 | -51.3 ± 2.8 | -50.2 ± 1.5 |
| E-7090-con2        | -70.7 | -59.4 ± 7.1 | -59.1 ± 6.6 | -60.1 ± 6.6 | -62.0 ± 6.7  | -65.8 ± 8.1 | -66.9 ± 6.5 | -71.9 ± 9.1 | -68.3 ± 7.8 | -66.8 ± 4.9 | -67.9 ± 2.4 | -68.5 ± 2.4 |
| WO2013129369-con1  | -54.7 | -50.4 ± 3.2 | -50.6 ± 2.8 | -51.0 ± 3.4 | -49.8 ± 3.6  | -48.7 ± 4.5 | -46.9 ± 2.9 | -47.1 ± 3.2 | -47.2 ± 2.9 | -46.6 ± 3.2 | -47.3 ± 0.8 | -47.0 ± 0.2 |
| WO2013129369-con2  | -48.0 | -39.9 ± 2.4 | -38.8 ± 2.9 | -36.8 ± 4.0 | -36.4 ± 3.5  | -35.1 ± 3.4 | -34.2 ± 3.8 | -35.7 ± 3.7 | -38.0 ± 5.4 | -44.6 ± 4.1 | -37.5 ± 4.2 | -38.1 ± 4.6 |
| WO2014139465-con1  | -51.7 | -58.8 ± 2.6 | -60.3 ± 3.1 | -57.8 ± 4.1 | -58.3 ± 3.7  | -59.5 ± 4.2 | -60.4 ± 3.7 | -60.3 ± 3.8 | -61.5 ± 3.6 | -61.3 ± 5.0 | -60.6 ± 0.8 | -60.8 ± 0.6 |
| WO2014139465-con2  | -53.5 | -67.2 ± 4.2 | -70.8 ± 5.5 | -65.5 ± 8.9 | -57.6 ± 11.0 | -54.3 ± 9.4 | -55.3 ± 5.2 | -58.9 ± 3.9 | -55.9 ± 6.5 | -62.4 ± 5.7 | -57.4 ± 3.3 | -58.1 ± 3.3 |
| ARQ-087-con1       | -59.6 | -47.9 ± 1.0 | -49.0 ± 1.5 | -51.1 ± 3.7 | -51.7 ± 3.3  | -52.8 ± 3.7 | -55.8 ± 3.8 | -54.8 ± 4.5 | -55.2 ± 3.0 | -55.9 ± 3.2 | -54.9 ± 1.3 | -55.4 ± 0.5 |
| ARQ-087-con2       | -55.7 | -46.2 ± 3.8 | -47.6 ± 4.6 | -48.6 ± 5.4 | -45.1 ± 6.1  | -41.0 ± 6.7 | -39.5 ± 4.3 | -45.4 ± 4.6 | -50.6 ± 7.1 | -39.9 ± 7.0 | -43.3 ± 4.7 | -43.9 ± 5.3 |

|                   |       |             |             |             |             |             |             |             |             |             |             |             |
|-------------------|-------|-------------|-------------|-------------|-------------|-------------|-------------|-------------|-------------|-------------|-------------|-------------|
| IJMS-6-con1       | -15.6 | -23.1 ± 0.3 | -23.4 ± 1.3 | -22.5 ± 1.9 | -21.8 ± 1.5 | -21.6 ± 1.5 | -21.4 ± 3.3 | -18.1 ± 3.5 | -18.7 ± 2.6 | -18.7 ± 2.7 | -19.7 ± 1.7 | -19.2 ± 1.5 |
| IJMS-6-con2       | -27.6 | -25.7 ± 0.7 | -25.1 ± 1.0 | -23.5 ± 2.1 | -23.4 ± 2.1 | -21.3 ± 7.3 | -23.3 ± 4.0 | -22.8 ± 2.4 | -24.1 ± 2.3 | -25.0 ± 2.1 | -23.3 ± 1.4 | -23.8 ± 1.0 |
| IJMS-42-con1      | -22.1 | -21.3 ± 2.7 | -20.9 ± 2.6 | -17.5 ± 3.9 | -16.8 ± 2.8 | -15.1 ± 3.6 | -20.2 ± 4.1 | -20.1 ± 3.6 | -20.2 ± 2.8 | -20.9 ± 3.7 | -19.3 ± 2.4 | -20.3 ± 0.4 |
| IJMS-42-con2      | -21.5 | -15.7 ± 2.8 | -16.9 ± 2.9 | -17.1 ± 3.0 | -16.9 ± 2.2 | -16.8 ± 2.6 | -19.7 ± 3.5 | -18.1 ± 3.0 | -16.3 ± 3.0 | -17.2 ± 3.0 | -17.6 ± 1.3 | -17.8 ± 1.4 |
| IJMS-92-con1      | -33.0 | -30.8 ± 3.3 | -30.7 ± 3.3 | -30.1 ± 3.4 | -27.8 ± 4.2 | -26.9 ± 3.7 | -26.6 ± 4.7 | -26.0 ± 2.4 | -31.7 ± 3.3 | -29.0 ± 3.3 | -28.0 ± 2.4 | -28.3 ± 2.6 |
| IJMS-92-con2      | -27.3 | -21.5 ± 2.9 | -22.9 ± 2.8 | -24.9 ± 3.2 | -24.9 ± 3.0 | -25.3 ± 2.7 | -25.1 ± 2.4 | -26.2 ± 2.3 | -24.1 ± 2.2 | -23.8 ± 2.4 | -24.9 ± 1.0 | -24.8 ± 1.1 |
| IJMS-96-con1      | -32.6 | -40.2 ± 3.0 | -38.6 ± 2.8 | -38.4 ± 3.2 | -36.5 ± 4.2 | -35.7 ± 4.6 | -22.7 ± 4.8 | -23.3 ± 3.0 | -23.2 ± 3.7 | -25.0 ± 4.2 | -26.0 ± 5.5 | -23.5 ± 1.0 |
| IJMS-96-con2      | -30.6 | -40.5 ± 5.9 | -39.3 ± 6.2 | -38.3 ± 5.5 | -39.7 ± 5.2 | -33.3 ± 8.1 | -26.7 ± 5.3 | -27.1 ± 4.1 | -18.3 ± 5.8 | -19.6 ± 4.1 | -25.0 ± 6.1 | -22.9 ± 4.6 |
| IJMS-99-con1      | -26.7 | -12.6 ± 5.3 | -11.3 ± 4.9 | -8.5 ± 4.5  | -10.3 ± 5.7 | -11.7 ± 5.4 | -10.6 ± 3.0 | -18.7 ± 5.2 | -19.3 ± 4.8 | -25.3 ± 3.4 | -17.1 ± 6.0 | -18.5 ± 6.0 |
| IJMS-99-con2      | -15.6 | -27.6 ± 1.7 | -27.0 ± 3.9 | -26.7 ± 3.3 | -28.2 ± 4.1 | -29.5 ± 4.1 | -29.1 ± 4.1 | -29.6 ± 4.4 | -27.8 ± 4.0 | -30.8 ± 3.9 | -29.4 ± 1.1 | -29.3 ± 1.2 |
| ZINC17342632-con1 | -24.5 | -25.2 ± 3.9 | -26.3 ± 3.1 | -27.5 ± 3.3 | -27.0 ± 4.3 | -26.2 ± 4.1 | -25.9 ± 4.0 | -25.2 ± 5.2 | -27.4 ± 2.7 | -26.4 ± 2.9 | -26.2 ± 0.8 | -26.2 ± 0.9 |
| ZINC2542634-con1  | -42.7 | -35.9 ± 1.9 | -36.8 ± 2.2 | -38.3 ± 3.2 | -36.6 ± 3.9 | -35.0 ± 3.9 | -32.0 ± 4.1 | -29.4 ± 5.0 | -38.6 ± 5.8 | -40.7 ± 4.0 | -35.1 ± 4.7 | -35.2 ± 5.4 |
| ZINC33357190-con1 | -29.2 | -32.6 ± 1.2 | -38.3 ± 6.2 | -40.1 ± 4.8 | -40.3 ± 4.6 | -41.5 ± 4.4 | -43.7 ± 5.0 | -46.5 ± 5.1 | -42.8 ± 4.9 | -45.2 ± 5.4 | -44.0 ± 2.0 | -44.6 ± 1.7 |
| ZINC3510461-con1  | -31.3 | -35.8 ± 2.8 | -37.4 ± 3.3 | -35.9 ± 3.2 | -36.2 ± 3.3 | -37.1 ± 3.4 | -37.7 ± 3.6 | -39.8 ± 3.1 | -39.3 ± 3.0 | -40.0 ± 3.0 | -38.8 ± 1.3 | -39.2 ± 1.0 |
| ZINC40583292-con1 | -43.6 | -40.8 ± 4.9 | -40.7 ± 4.1 | -40.1 ± 3.2 | -40.4 ± 2.8 | -37.9 ± 4.2 | -36.2 ± 4.1 | -35.8 ± 4.3 | -35.1 ± 3.3 | -34.8 ± 4.0 | -36.0 ± 1.2 | -35.5 ± 0.6 |
| ZINC49405771-con1 | -27.1 | -26.9 ± 3.1 | -26.2 ± 2.5 | -27.9 ± 4.0 | -28.9 ± 3.9 | -29.2 ± 3.5 | -32.2 ± 2.6 | -31.1 ± 3.0 | -30.7 ± 3.4 | -31.1 ± 4.3 | -30.9 ± 1.1 | -31.3 ± 0.7 |
| ZINC71886989-con1 | -40.1 | -39.0 ± 2.6 | -38.3 ± 2.4 | -39.1 ± 2.4 | -39.2 ± 3.0 | -38.9 ± 3.2 | -40.3 ± 3.2 | -39.8 ± 2.7 | -39.3 ± 3.1 | -40.3 ± 3.1 | -39.7 ± 0.6 | -39.9 ± 0.5 |
| ARQ-068-con1      | -40.7 | -38.5 ± 1.8 | -39.7 ± 2.0 | -38.6 ± 3.0 | -39.1 ± 2.6 | -39.8 ± 2.6 | -33.9 ± 4.7 | -33.4 ± 3.8 | -27.6 ± 3.5 | -30.2 ± 4.3 | -33.0 ± 4.6 | -31.3 ± 2.9 |
| ARQ-068-con2      | -26.8 | -25.3 ± 1.5 | -24.4 ± 2.1 | -22.4 ± 2.6 | -21.5 ± 3.0 | -21.3 ± 3.1 | -34.0 ± 5.5 | -34.6 ± 4.7 | -36.0 ± 4.7 | -34.9 ± 4.2 | -32.2 ± 6.1 | -34.9 ± 0.9 |

**Table S5.** The  $\Delta G_{bind}$  with entropy contribution obtained using quasi-harmonic analysis. Unit: kcal/mol.

|                   | 0-1 ns | 0-2 ns | 0-5 ns | 0-10 ns | 0-20 ns | 20-40 ns | 40-60 ns | 60-80 ns | 80-100 ns | 0-100 ns | 20-100 ns |
|-------------------|--------|--------|--------|---------|---------|----------|----------|----------|-----------|----------|-----------|
| ARQ-069-crystal   | -12.6  | -7.0   | -3.3   | -2.6    | 1.1     | 0.6      | 2.1      | 0.4      | 1.6       | 1.2      | 1.2       |
| ARQ-069-con1      | -21.5  | -19.2  | -13.2  | -12.1   | -6.8    | 1.7      | -0.6     | 0.0      | 0.3       | -1.1     | 0.3       |
| ARQ-069-con2      | -2.7   | 2.2    | 8.4    | 10.7    | 14.0    | 10.0     | 15.0     | 16.4     | 16.3      | 14.4     | 14.5      |
| ARQ-069-con3      | -2.5   | 1.4    | 8.5    | 11.3    | 15.1    | 22.1     | 21.2     | 22.1     | 12.5      | 18.6     | 19.5      |
| ARQ-069-con4      | -15.6  | -13.3  | -12.2  | -11.7   | -6.0    | -1.2     | -0.9     | -0.9     | -1.3      | -2.1     | -1.1      |
| CH5183284-crystal | -16.8  | -11.5  | -2.5   | -3.2    | 0.3     | 1.1      | 1.4      | 1.6      | 0.9       | 1.1      | 1.2       |
| CH5183284-con1    | -12.6  | -6.3   | 2.8    | 4.5     | 9.0     | -1.5     | 2.1      | 0.8      | 4.0       | 2.9      | 1.3       |
| CH5183284-con2    | -9.0   | -5.0   | 3.0    | 4.3     | 9.0     | 14.0     | 12.8     | 19.0     | 14.9      | 13.9     | 15.2      |
| CH5183284-con3    | -3.9   | -0.4   | 7.2    | 6.3     | 11.1    | 17.6     | 13.0     | 11.5     | 9.2       | 12.5     | 12.8      |
| CH5183284-con4    | -13.7  | -7.0   | 0.8    | -0.9    | 3.4     | 0.6      | 3.2      | 3.0      | 1.5       | 2.3      | 2.0       |
| E-3810-crystal    | -18.8  | 12.4   | 7.3    | 3.6     | 16.0    | 14.7     | 10.7     | 9.4      | 8.7       | 11.9     | 10.9      |
| E-3810-con1       | -20.0  | -13.2  | 3.5    | 3.3     | 12.8    | 9.2      | 10.5     | 11.1     | 11.6      | 11.0     | 10.6      |
| E-3810-con2       | -11.7  | -84.6  | 11.4   | 14.2    | 23.5    | 15.6     | 13.2     | 16.5     | 10.3      | 15.8     | 13.9      |
| E-3810-con3       | -1.8   | 2.6    | 18.9   | 18.6    | 37.2    | 40.7     | 31.5     | 39.9     | 38.1      | 37.5     | 37.6      |
| E-3810-con4       | -19.7  | -13.0  | 1.1    | 4.5     | 16.2    | 17.2     | 13.8     | 9.6      | 10.3      | 13.4     | 12.7      |
| LY2874455-crystal | -9.4   | -3.3   | 7.3    | 8.6     | 16.7    | 13.7     | 14.5     | 13.3     | 11.4      | 13.9     | 13.2      |
| LY2874455-con1    | -11.9  | -5.2   | 7.8    | 9.3     | 18.2    | 17.3     | 19.4     | 21.1     | 15.9      | 18.4     | 18.4      |
| LY2874455-con2    | -25.7  | -22.3  | -13.5  | -12.2   | -5.9    | 14.1     | 21.0     | 10.9     | 13.9      | 10.8     | 15.0      |
| LY2874455-con3    | -14.2  | -3.9   | 10.6   | 9.4     | 16.8    | 14.9     | 13.4     | 13.7     | 15.1      | -9.3     | -15.8     |
| LY2874455-con4    | -17.3  | -11.1  | -0.1   | 5.6     | 16.5    | 16.8     | 15.2     | 15.9     | 12.4      | 15.4     | 15.1      |

|                     |       |       |       |       |       |      |       |       |       |       |      |
|---------------------|-------|-------|-------|-------|-------|------|-------|-------|-------|-------|------|
| AZD4547-crystal     | -29.3 | -18.6 | -2.3  | -2.6  | 10.3  | 12.7 | 11.6  | 10.5  | 12.0  | 11.4  | 11.7 |
| AZD4547-con1        | -28.0 | -19.5 | -5.9  | -4.2  | 9.4   | 11.1 | 12.4  | 9.9   | 10.3  | 10.6  | 10.9 |
| AZD4547-con2        | -34.9 | -27.4 | -10.9 | -9.6  | 9.8   | 18.1 | 15.3  | 19.8  | 18.9  | 16.4  | 18.0 |
| AZD4547-con3        | -12.5 | 0.6   | 20.3  | 22.2  | 37.9  | 37.7 | 35.6  | 36.9  | 31.3  | 35.9  | 35.4 |
| AZD4547-con4        | -33.6 | -25.1 | -6.4  | -2.5  | 8.0   | 10.9 | 11.2  | 11.8  | 12.4  | 10.9  | 11.6 |
| Compound7n-crystal  | -14.1 | -8.6  | 4.4   | 4.6   | 17.3  | 15.9 | 20.0  | 15.8  | 14.7  | 16.7  | 16.6 |
| Compound7n-con1     | -19.5 | -13.1 | 2.5   | 3.7   | 16.3  | 16.2 | 15.7  | 21.2  | 24.0  | 18.7  | 19.3 |
| Compound7n-con2     | -12.5 | -2.9  | 9.4   | 10.5  | 18.0  | 22.1 | 22.3  | 21.3  | 22.1  | 21.2  | 22.0 |
| Compound7n-con3     | -33.2 | -20.2 | 0.0   | 1.8   | 14.5  | 14.8 | 15.0  | 15.3  | 15.1  | 14.9  | 15.0 |
| Dovitinib-crystal   | -5.6  | -0.3  | 9.5   | 8.4   | 13.1  | 14.9 | 10.6  | 8.5   | -2.3  | 9.0   | 7.9  |
| Dovitinib-con1      | -6.8  | -0.2  | 8.5   | 9.2   | 13.7  | 12.5 | 13.7  | 13.3  | 13.2  | 13.3  | 13.2 |
| Dovitinib-con2      | -33.2 | -27.3 | -15.9 | -9.5  | 11.0  | 25.1 | 18.7  | 8.0   | 16.1  | 15.8  | 17.0 |
| Dovitinib-con3      | -36.2 | -31.0 | -22.9 | -25.0 | -18.5 | 5.6  | -10.3 | -14.4 | -14.3 | -10.4 | -8.4 |
| Erdafitinib-crystal | -32.8 | -24.6 | -11.2 | -8.5  | 5.8   | 12.5 | 9.3   | 6.5   | 5.7   | 8.0   | 8.5  |
| Erdafitinib-con1    | -36.2 | -25.4 | -6.9  | -7.8  | 8.3   | 11.1 | 9.8   | 10.0  | 11.3  | 10.1  | 10.5 |
| Erdafitinib-con2    | -24.6 | -14.3 | 8.6   | 9.6   | 21.0  | 18.3 | 20.7  | 10.0  | 23.4  | 18.7  | 18.1 |
| Erdafitinib-con3    | -23.2 | -15.4 | -1.9  | -1.6  | 12.3  | 11.1 | 11.5  | 11.0  | 10.4  | 11.3  | 11.0 |
| Erdafitinib-con4    | -33.7 | -28.4 | -13.0 | -8.2  | 8.6   | 12.5 | 11.4  | 9.3   | 9.2   | 10.2  | 10.6 |
| Compound6-crystal   | 1.1   | 6.5   | 15.1  | 15.9  | 19.7  | 19.1 | 18.2  | 20.2  | 17.0  | 18.8  | 18.6 |
| Compound6-con1      | -2.2  | 2.3   | 14.6  | 16.5  | 23.7  | 33.0 | 27.3  | 27.6  | 24.5  | 27.2  | 28.1 |
| Compound6-con2      | 7.3   | 12.6  | 21.7  | 22.1  | 24.7  | 26.4 | 25.4  | 25.2  | 22.7  | 24.9  | 24.9 |

|                    |       |       |      |      |      |      |      |      |      |      |      |
|--------------------|-------|-------|------|------|------|------|------|------|------|------|------|
| Compound6-con3     | 12.8  | 17.8  | 25.6 | 27.4 | 32.7 | 32.3 | 35.9 | 44.7 | 35.6 | 36.3 | 37.1 |
| Compound6-con4     | 2.6   | 9.2   | 19.1 | 18.1 | 20.6 | 18.3 | 21.2 | 19.5 | 19.3 | 19.8 | 19.6 |
| Lenvatinib-crystal | -28.1 | -25.8 | -9.1 | -7.5 | -0.5 | -2.1 | -0.2 | -0.6 | -0.3 | -0.7 | -0.8 |
| Lenvatinib-con1    | -6.1  | 1.0   | 12.5 | 13.1 | 20.2 | 18.2 | 17.5 | 17.1 | 17.2 | 18.1 | 17.5 |
| Lenvatinib-con2    | -6.2  | 1.3   | 17.3 | 20.0 | 28.8 | 25.3 | 36.3 | 35.1 | 35.0 | 32.1 | 32.9 |
| Lenvatinib-con3    | 1.1   | 7.1   | 22.4 | 25.9 | 36.5 | 37.1 | 39.9 | 29.5 | 20.1 | 32.6 | 31.6 |
| Lenvatinib-con4    | -3.0  | 2.5   | 13.7 | 10.2 | 12.9 | 5.2  | 4.4  | 3.9  | 7.5  | 6.8  | 5.3  |
| ASP-5878-con1      | -13.2 | -4.9  | 10.1 | 10.3 | 19.5 | 20.5 | 19.3 | 16.4 | 17.7 | 18.7 | 18.5 |
| ASP-5878-con2      | 0.6   | 7.3   | 21.6 | 18.8 | 26.7 | 21.1 | 18.0 | 19.0 | 13.2 | 19.6 | 17.8 |
| ASP-5878-con3      | -0.9  | 5.1   | 19.3 | 20.7 | 32.6 | 33.7 | 24.1 | 25.6 | 24.9 | 28.2 | 27.1 |
| E-7090-con1        | -17.5 | -10.8 | 5.5  | 6.3  | 23.6 | 28.9 | 32.7 | 34.2 | 33.5 | 30.6 | 32.3 |
| E-7090-con2        | -25.0 | -15.2 | 2.0  | 0.9  | 15.1 | 13.6 | 7.5  | 12.6 | 9.9  | 11.7 | 10.9 |
| WO2013129369-con1  | -17.0 | -10.0 | 4.8  | 5.6  | 18.3 | 19.7 | 21.4 | 20.0 | 21.5 | 20.2 | 20.6 |
| WO2013129369-con2  | -7.9  | 1.4   | 20.2 | 21.6 | 34.2 | 35.8 | 35.8 | 34.6 | 17.9 | 31.7 | 31.0 |
| WO2014139465-con1  | -25.1 | -19.1 | 1.1  | 0.8  | 13.1 | 9.9  | 10.5 | 9.6  | 12.1 | 11.1 | 10.5 |
| WO2014139465-con2  | -32.7 | -28.5 | -7.3 | 2.6  | 29.6 | 28.0 | 13.2 | 19.5 | 13.9 | 20.8 | 18.6 |
| ARQ-087-con1       | -15.9 | -10.9 | 2.8  | 0.5  | 7.8  | 2.1  | 4.6  | 0.9  | 2.7  | 3.6  | 2.6  |
| ARQ-087-con2       | -13.8 | -8.0  | 3.7  | 8.9  | 22.8 | 24.0 | 19.9 | 17.4 | 28.9 | 22.6 | 22.6 |



**Table S6.** The  $\Delta G_{bind}$  with interaction entropy contribution.<sup>1</sup> Unit: kcal/mol.

|                   | 0-1 ns | 0-2 ns | 0-5 ns | 0-10 ns | 0-20 ns | 20-40 ns | 40-60 ns | 60-80 ns | 80-100 ns | 0-100 ns | 20-100 ns |
|-------------------|--------|--------|--------|---------|---------|----------|----------|----------|-----------|----------|-----------|
| ARQ-069-crystal   | -38.8  | -33.8  | -35.2  | -35.0   | -33.8   | -35.1    | -33.8    | -33.7    | -33.7     | -34.1    | -34.1     |
| ARQ-069-con1      | -47.7  | -48.4  | -45.2  | -44.0   | -41.3   | -35.2    | -34.7    | -34.8    | -35.6     | -35.6    | -35.1     |
| ARQ-069-con2      | -29.7  | -30.3  | -27.5  | -24.6   | -24.9   | -25.4    | -21.2    | -21.2    | -20.6     | -22.0    | -21.4     |
| ARQ-069-con3      | -29.2  | -28.8  | -22.8  | -21.8   | -20.7   | -13.0    | -15.1    | -15.7    | -23.4     | -16.8    | -15.9     |
| ARQ-069-con4      | -41.1  | -43.0  | -44.7  | -44.0   | -38.4   | -37.7    | -36.8    | -35.7    | -36.4     | -36.8    | -36.6     |
| CH5183284-crystal | -44.8  | -43.4  | -41.9  | -42.5   | -42.3   | -41.5    | -40.4    | -39.7    | -40.7     | -40.7    | -40.3     |
| CH5183284-con1    | -37.6  | -36.0  | -35.7  | -34.3   | -33.6   | -38.2    | -36.9    | -38.6    | -34.7     | -34.6    | -36.4     |
| CH5183284-con2    | -35.1  | -35.8  | -34.1  | -32.2   | -31.8   | -27.5    | -29.4    | -24.9    | -26.7     | -27.6    | -26.6     |
| CH5183284-con3    | -32.8  | -32.9  | -29.0  | -29.8   | -29.7   | -24.5    | -25.6    | -25.9    | -32.0     | -27.5    | -26.9     |
| CH5183284-con4    | -42.3  | -39.9  | -38.9  | -40.1   | -39.1   | -39.8    | -37.4    | -39.0    | -39.4     | -38.2    | -38.6     |
| E-3810-crystal    | -45.2  | -47.0  | -46.5  | -45.1   | -45.4   | -47.6    | -49.9    | -50.7    | -50.5     | -48.5    | -49.5     |
| E-3810-con1       | -49.3  | -51.2  | -48.9  | -47.6   | -48.5   | -50.5    | -49.5    | -49.4    | -49.3     | -49.4    | -49.7     |
| E-3810-con2       | -41.3  | -36.4  | -34.7  | -34.7   | -40.3   | -43.2    | -48.1    | -42.7    | -46.9     | -43.4    | -44.4     |
| E-3810-con3       | -32.4  | -32.1  | -30.6  | -31.0   | -27.7   | -28.4    | -30.7    | -27.8    | -24.9     | -27.9    | -28.0     |
| E-3810-con4       | -46.3  | -48.2  | -48.1  | -46.8   | -46.6   | -45.3    | -47.4    | -50.4    | -49.0     | -47.7    | -48.0     |
| LY2874455-crystal | -37.5  | -37.9  | -38.0  | -38.2   | -39.9   | -41.5    | -40.2    | -43.2    | -44.2     | -41.6    | -42.3     |
| LY2874455-con1    | -43.1  | -42.4  | -39.8  | -39.2   | -39.7   | -39.2    | -38.6    | -39.2    | -39.8     | -38.9    | -38.9     |
| LY2874455-con2    | -57.2  | -58.4  | -57.4  | -56.8   | -55.7   | -37.4    | -31.6    | -39.1    | -38.5     | -37.4    | -36.1     |
| LY2874455-con3    | -45.5  | -42.5  | -41.3  | -40.4   | -41.0   | -41.6    | -42.6    | -41.9    | -42.4     | -41.9    | -42.0     |
| LY2874455-con4    | -48.9  | -47.9  | -46.4  | -42.9   | -41.7   | -40.4    | -40.0    | -41.0    | -41.3     | -40.6    | -40.3     |

|                     |       |       |       |       |       |       |       |       |       |       |       |
|---------------------|-------|-------|-------|-------|-------|-------|-------|-------|-------|-------|-------|
| AZD4547-crystal     | -61.2 | -58.3 | -56.6 | -55.8 | -55.7 | -52.8 | -54.6 | -54.5 | -55.3 | -54.5 | -54.3 |
| AZD4547-con1        | -58.2 | -55.8 | -56.0 | -54.9 | -53.9 | -54.7 | -54.8 | -54.9 | -54.5 | -54.5 | -54.6 |
| AZD4547-con2        | -64.0 | -60.4 | -58.1 | -56.7 | -54.0 | -47.9 | -49.6 | -46.8 | -46.0 | -48.7 | -47.5 |
| AZD4547-con3        | -42.2 | -38.9 | -37.2 | -37.7 | -37.5 | -39.6 | -41.3 | -40.1 | -46.2 | -39.9 | -41.3 |
| AZD4547-con4        | -64.4 | -62.6 | -55.9 | -53.5 | -55.0 | -54.8 | -55.9 | -52.9 | -54.3 | -54.3 | -54.3 |
| Compound7n-crystal  | -44.2 | -46.0 | -47.6 | -49.1 | -48.1 | -48.1 | -47.3 | -47.8 | -48.6 | -47.9 | -47.8 |
| Compound7n-con1     | -49.4 | -50.6 | -49.3 | -49.1 | -47.5 | -47.2 | -47.8 | -46.0 | -39.9 | -44.4 | -43.6 |
| Compound7n-con2     | -38.8 | -39.0 | -41.0 | -41.1 | -42.5 | -40.5 | -38.4 | -40.2 | -39.7 | -39.9 | -39.3 |
| Compound7n-con3     | -59.9 | -55.1 | -52.1 | -52.4 | -50.4 | -51.7 | -49.8 | -50.7 | -47.9 | -50.0 | -49.9 |
| Dovitinib-crystal   | -35.2 | -35.6 | -36.4 | -36.8 | -37.1 | -35.2 | -38.9 | -39.8 | -46.9 | -38.8 | -39.5 |
| Dovitinib-con1      | -36.5 | -34.8 | -35.8 | -35.4 | -35.3 | -37.5 | -35.9 | -35.9 | -35.9 | -35.8 | -36.0 |
| Dovitinib-con2      | -61.2 | -60.8 | -57.0 | -45.9 | -29.2 | -20.4 | -27.5 | -36.4 | -30.0 | -27.0 | -26.9 |
| Dovitinib-con3      | -61.4 | -61.8 | -62.5 | -63.8 | -60.6 | -48.2 | -53.5 | -58.5 | -58.5 | -54.6 | -53.6 |
| Erdafitinib-crystal | -62.9 | -61.7 | -61.5 | -58.7 | -56.8 | -53.2 | -53.4 | -56.0 | -56.1 | -54.8 | -54.3 |
| Erdafitinib-con1    | -66.4 | -61.0 | -53.2 | -55.1 | -53.9 | -52.4 | -54.4 | -54.5 | -55.4 | -53.7 | -53.6 |
| Erdafitinib-con2    | -49.3 | -48.3 | -44.5 | -43.9 | -42.6 | -43.1 | -44.3 | -50.7 | -45.7 | -44.4 | -44.9 |
| Erdafitinib-con3    | -52.7 | -50.8 | -53.2 | -53.0 | -53.2 | -50.4 | -52.8 | -50.9 | -51.9 | -51.6 | -51.3 |
| Erdafitinib-con4    | -63.7 | -64.2 | -63.6 | -56.9 | -54.2 | -54.0 | -54.3 | -54.2 | -55.1 | -54.3 | -54.3 |
| Compound6-crystal   | -26.9 | -26.0 | -26.1 | -25.6 | -25.1 | -24.6 | -25.8 | -24.0 | -25.4 | -24.9 | -25.0 |
| Compound6-con1      | -30.2 | -29.9 | -24.7 | -23.0 | -19.2 | -12.8 | -17.6 | -17.6 | -19.6 | -15.7 | -16.8 |
| Compound6-con2      | -18.9 | -17.8 | -17.0 | -16.7 | -18.4 | -17.3 | -18.4 | -18.5 | -21.7 | -18.0 | -18.0 |

|                    |       |       |       |       |       |       |       |       |       |       |       |
|--------------------|-------|-------|-------|-------|-------|-------|-------|-------|-------|-------|-------|
| Compound6-con3     | -15.5 | -15.6 | -10.8 | -10.9 | -8.7  | -10.1 | -8.1  | -1.1  | -3.0  | 0.3   | -1.1  |
| Compound6-con4     | -26.3 | -23.9 | -21.5 | -22.5 | -24.1 | -24.9 | -23.7 | -24.2 | -24.6 | -23.8 | -23.8 |
| Lenvatinib-crystal | -53.5 | -56.5 | -52.4 | -53.0 | -51.2 | -51.8 | -49.7 | -51.4 | -51.7 | -51.1 | -51.1 |
| Lenvatinib-con1    | -33.1 | -33.7 | -32.4 | -31.0 | -30.9 | -32.2 | -31.4 | -32.0 | -32.6 | -31.3 | -31.9 |
| Lenvatinib-con2    | -33.8 | -28.9 | -23.2 | -22.3 | -21.8 | -27.8 | -8.6  | -19.3 | -19.9 | -12.4 | -11.8 |
| Lenvatinib-con3    | -29.7 | -29.5 | -23.0 | -18.9 | -18.3 | -17.7 | -20.9 | -23.7 | -32.8 | -20.4 | -21.0 |
| Lenvatinib-con4    | -30.0 | -29.3 | -29.5 | -34.1 | -39.7 | -46.2 | -43.2 | -45.8 | -42.3 | -43.3 | -44.2 |
| ASP-5878-con1      | -43.3 | -41.1 | -39.2 | -36.9 | -38.1 | -38.5 | -40.1 | -39.2 | -39.3 | -38.8 | -39.0 |
| ASP-5878-con2      | -28.5 | -29.5 | -30.8 | -33.7 | -36.7 | -38.9 | -40.7 | -37.9 | -42.2 | -36.7 | -37.2 |
| ASP-5878-con3      | -29.3 | -31.2 | -31.1 | -29.4 | -26.6 | -24.1 | -31.2 | -32.1 | -30.5 | -26.3 | -28.9 |
| E-7090-con1        | -48.8 | -50.7 | -51.0 | -49.1 | -48.7 | -45.5 | -41.6 | -38.4 | -42.2 | -43.2 | -41.8 |
| E-7090-con2        | -51.5 | -50.1 | -52.5 | -54.8 | -58.0 | -60.9 | -62.0 | -59.7 | -61.3 | -60.1 | -60.6 |
| WO2013129369-con1  | -49.3 | -47.5 | -46.5 | -45.3 | -43.0 | -42.5 | -39.5 | -43.1 | -40.4 | -41.5 | -41.4 |
| WO2013129369-con2  | -34.7 | -34.2 | -33.0 | -31.4 | -29.8 | -25.6 | -27.6 | -27.5 | -37.0 | -25.7 | -25.8 |
| WO2014139465-con1  | -56.8 | -58.8 | -55.4 | -54.2 | -55.5 | -56.1 | -57.0 | -57.5 | -57.1 | -56.5 | -56.9 |
| WO2014139465-con2  | -62.8 | -66.5 | -58.1 | -48.8 | -45.5 | -49.7 | -55.0 | -50.8 | -56.2 | -50.4 | -51.7 |
| ARQ-087-con1       | -46.0 | -47.3 | -45.5 | -47.5 | -47.7 | -52.3 | -51.8 | -51.9 | -53.1 | -51.3 | -52.3 |
| ARQ-087-con2       | -42.4 | -43.1 | -45.4 | -40.9 | -35.7 | -34.4 | -40.6 | -45.0 | -35.7 | -37.8 | -38.3 |

**Table S7.** The RMSD<sup>A</sup> (against the PDB structure) of each ligand at different timescales of the MD simulation. Values are reported in form of means  $\pm$  standard deviation. The error bars for 0-100 ns and 20-100 ns results were calculated using the standard deviation of the values of 0-20 ns, 20-40 ns, 40-60 ns, 60-80 ns and 80-100 ns MD simulation. Unit: Å.

|                   | Min  | 0-1 ns         | 0-2 ns         | 0-5 ns         | 0-10 ns        | 0-20 ns        | 20-40 ns       | 40-60 ns       | 60-80 ns       | 80-100 ns      | 0-100 ns       | 20-100 ns      |
|-------------------|------|----------------|----------------|----------------|----------------|----------------|----------------|----------------|----------------|----------------|----------------|----------------|
| ARQ-069-crystal   | 0.2  | 0.9 $\pm$ 0.2  | 0.9 $\pm$ 0.3  | 1.1 $\pm$ 0.3  | 1.2 $\pm$ 0.3  | 1.3 $\pm$ 0.4  | 1.3 $\pm$ 0.5  | 1.3 $\pm$ 0.4  | 1.2 $\pm$ 0.3  | 1.2 $\pm$ 0.3  | 1.3 $\pm$ 0.4  | 1.3 $\pm$ 0.4  |
| ARQ-069-con1      | 1.7  | 0.9 $\pm$ 0.2  | 1.1 $\pm$ 0.2  | 1.1 $\pm$ 0.2  | 1.1 $\pm$ 0.2  | 1.0 $\pm$ 0.2  | 1.2 $\pm$ 0.4  | 1.4 $\pm$ 0.4  | 1.7 $\pm$ 0.3  | 1.7 $\pm$ 0.4  | 1.4 $\pm$ 0.5  | 1.5 $\pm$ 0.4  |
| ARQ-069-con2      | 4.6  | 4.4 $\pm$ 0.2  | 4.5 $\pm$ 0.3  | 4.5 $\pm$ 0.3  | 4.6 $\pm$ 0.3  | 4.6 $\pm$ 0.3  | 4.7 $\pm$ 0.3  | 4.8 $\pm$ 0.3  |
| ARQ-069-con3      | 5.7  | 6.2 $\pm$ 0.1  | 6.2 $\pm$ 0.2  | 6.4 $\pm$ 0.2  | 6.4 $\pm$ 0.2  | 6.6 $\pm$ 0.6  | 7.3 $\pm$ 0.9  | 7.6 $\pm$ 0.3  | 7.3 $\pm$ 0.5  | 6.6 $\pm$ 0.5  | 7.1 $\pm$ 0.7  | 7.2 $\pm$ 0.7  |
| ARQ-069-con4      | 0.3  | 1.1 $\pm$ 0.2  | 1.1 $\pm$ 0.2  | 1.3 $\pm$ 0.2  | 1.3 $\pm$ 0.2  | 1.1 $\pm$ 0.3  | 1.0 $\pm$ 0.4  | 0.9 $\pm$ 0.3  | 1.0 $\pm$ 0.4  | 1.0 $\pm$ 0.3  | 1.0 $\pm$ 0.4  | 1.0 $\pm$ 0.4  |
| CH5183284-crystal | 0.4  | 0.7 $\pm$ 0.2  | 0.8 $\pm$ 0.2  | 0.9 $\pm$ 0.2  | 0.8 $\pm$ 0.2  | 0.8 $\pm$ 0.2  | 0.8 $\pm$ 0.2  | 0.8 $\pm$ 0.2  |
| CH5183284-con1    | 2.4  | 2.1 $\pm$ 0.1  | 2.2 $\pm$ 0.2  | 2.3 $\pm$ 0.2  |
| CH5183284-con2    | 3.9  | 3.6 $\pm$ 0.2  | 3.6 $\pm$ 0.2  | 3.8 $\pm$ 0.3  | 3.8 $\pm$ 0.3  | 3.7 $\pm$ 0.3  | 4.3 $\pm$ 0.7  | 5.0 $\pm$ 0.5  | 4.9 $\pm$ 0.4  | 4.8 $\pm$ 0.4  | 4.5 $\pm$ 0.7  | 4.7 $\pm$ 0.6  |
| CH5183284-con3    | 10.0 | 9.9 $\pm$ 0.0  | 9.9 $\pm$ 0.1  | 9.9 $\pm$ 0.1  | 9.9 $\pm$ 0.1  | 9.9 $\pm$ 0.1  | 9.8 $\pm$ 0.1  | 9.7 $\pm$ 0.1  | 9.9 $\pm$ 0.2  | 10.2 $\pm$ 0.1 | 9.9 $\pm$ 0.3  | 9.9 $\pm$ 0.2  |
| CH5183284-con4    | 0.5  | 0.8 $\pm$ 0.2  | 0.8 $\pm$ 0.2  | 0.9 $\pm$ 0.2  | 0.8 $\pm$ 0.2  | 0.9 $\pm$ 0.3  | 0.8 $\pm$ 0.3  | 1.0 $\pm$ 0.3  | 0.8 $\pm$ 0.2  | 0.9 $\pm$ 0.2  | 0.9 $\pm$ 0.3  | 0.9 $\pm$ 0.3  |
| E-3810-crystal    | 0.3  | 1.1 $\pm$ 0.2  | 1.2 $\pm$ 0.2  | 1.4 $\pm$ 0.3  | 1.3 $\pm$ 0.3  | 1.3 $\pm$ 0.3  | 1.5 $\pm$ 0.4  | 1.5 $\pm$ 0.3  |
| E-3810-con1       | 0.9  | 1.0 $\pm$ 0.2  | 1.1 $\pm$ 0.2  | 1.2 $\pm$ 0.2  | 1.1 $\pm$ 0.2  | 1.1 $\pm$ 0.2  | 1.2 $\pm$ 0.3  | 1.3 $\pm$ 0.3  | 1.3 $\pm$ 0.3  | 1.2 $\pm$ 0.3  | 1.2 $\pm$ 0.3  | 1.3 $\pm$ 0.3  |
| E-3810-con2       | 5.1  | 3.8 $\pm$ 0.3  | 3.9 $\pm$ 0.3  | 3.8 $\pm$ 0.3  | 3.8 $\pm$ 0.4  | 2.6 $\pm$ 1.2  | 1.3 $\pm$ 0.3  | 1.6 $\pm$ 0.3  | 1.4 $\pm$ 0.3  | 1.5 $\pm$ 0.3  | 1.7 $\pm$ 0.8  | 10.4 $\pm$ 0.8 |
| E-3810-con3       | 9.0  | 10.0 $\pm$ 0.2 | 10.0 $\pm$ 0.2 | 10.0 $\pm$ 0.2 | 10.0 $\pm$ 0.3 | 10.3 $\pm$ 0.5 | 11.2 $\pm$ 0.7 | 10.4 $\pm$ 0.2 | 10.2 $\pm$ 0.6 | 9.7 $\pm$ 0.6  | 10.4 $\pm$ 0.8 | 1.5 $\pm$ 0.3  |
| E-3810-con4       | 0.9  | 1.2 $\pm$ 0.3  | 1.1 $\pm$ 0.2  | 1.1 $\pm$ 0.2  | 1.2 $\pm$ 0.3  | 1.2 $\pm$ 0.2  | 1.2 $\pm$ 0.3  | 1.2 $\pm$ 0.3  | 1.2 $\pm$ 0.2  | 1.1 $\pm$ 0.3  | 1.2 $\pm$ 0.3  | 1.2 $\pm$ 0.3  |
| LY2874455-crystal | 0.6  | 1.1 $\pm$ 0.2  | 1.2 $\pm$ 0.2  | 1.2 $\pm$ 0.2  | 1.2 $\pm$ 0.2  | 1.3 $\pm$ 0.3  | 1.2 $\pm$ 0.3  | 1.2 $\pm$ 0.2  | 1.2 $\pm$ 0.2  | 1.0 $\pm$ 0.5  | 1.2 $\pm$ 0.4  | 1.1 $\pm$ 0.4  |
| LY2874455-con1    | 1.6  | 1.1 $\pm$ 0.2  | 1.1 $\pm$ 0.2  | 1.1 $\pm$ 0.2  | 1.1 $\pm$ 0.2  | 1.3 $\pm$ 0.4  | 1.5 $\pm$ 0.3  | 1.7 $\pm$ 0.6  | 2.7 $\pm$ 0.6  | 1.7 $\pm$ 0.3  | 1.8 $\pm$ 0.7  | 1.9 $\pm$ 0.7  |
| LY2874455-con2    | 7.5  | 7.8 $\pm$ 0.1  | 7.8 $\pm$ 0.1  | 7.8 $\pm$ 0.1  | 7.9 $\pm$ 0.2  | 8.0 $\pm$ 0.2  | 7.8 $\pm$ 0.2  | 7.7 $\pm$ 0.2  | 7.8 $\pm$ 0.2  | 8.0 $\pm$ 0.2  | 7.8 $\pm$ 0.2  | 7.8 $\pm$ 0.2  |
| LY2874455-con3    | 2.1  | 2.4 $\pm$ 0.2  | 2.2 $\pm$ 0.2  | 2.1 $\pm$ 0.2  | 2.1 $\pm$ 0.2  | 2.1 $\pm$ 0.2  | 1.9 $\pm$ 0.1  | 2.0 $\pm$ 0.1  | 2.0 $\pm$ 0.1  | 2.0 $\pm$ 0.1  | 2.0 $\pm$ 0.2  | 2.0 $\pm$ 0.1  |

|                     |      |            |            |            |            |            |            |            |            |            |            |            |
|---------------------|------|------------|------------|------------|------------|------------|------------|------------|------------|------------|------------|------------|
| LY2874455-con4      | 2.3  | 2.2 ± 0.2  | 2.3 ± 0.2  | 2.2 ± 0.2  | 2.1 ± 0.4  | 1.8 ± 0.5  | 1.5 ± 0.3  | 1.6 ± 0.3  | 1.6 ± 0.4  | 1.2 ± 0.3  | 1.5 ± 0.4  | 1.5 ± 0.4  |
| AZD4547-crystal     | 0.3  | 2.0 ± 0.3  | 1.7 ± 0.5  | 1.5 ± 0.4  | 1.5 ± 0.4  | 1.5 ± 0.4  | 1.4 ± 0.4  | 1.6 ± 0.4  | 1.8 ± 0.2  | 1.5 ± 0.4  | 1.6 ± 0.4  | 1.6 ± 0.4  |
| AZD4547-con1        | 1.6  | 1.1 ± 0.2  | 1.1 ± 0.2  | 1.1 ± 0.2  | 1.0 ± 0.2  | 1.1 ± 0.3  | 1.5 ± 0.4  | 1.5 ± 0.4  | 1.4 ± 0.4  | 1.4 ± 0.4  | 1.4 ± 0.4  | 1.5 ± 0.4  |
| AZD4547-con2        | 2.7  | 1.8 ± 0.2  | 1.8 ± 0.2  | 2.2 ± 0.4  | 2.0 ± 0.5  | 2.0 ± 0.4  | 1.8 ± 0.3  | 1.8 ± 0.4  | 2.1 ± 0.4  | 2.1 ± 0.5  | 2.0 ± 0.4  | 2.3 ± 0.4  |
| AZD4547-con3        | 13.5 | 13.1 ± 0.3 | 13.2 ± 0.2 | 13.3 ± 0.2 | 13.1 ± 0.4 | 12.9 ± 0.4 | 13.0 ± 0.5 | 13.1 ± 0.4 | 12.7 ± 0.5 | 12.9 ± 0.4 | 12.9 ± 0.5 | 2.0 ± 0.4  |
| AZD4547-con4        | 0.9  | 1.2 ± 0.2  | 1.2 ± 0.2  | 1.1 ± 0.2  | 1.2 ± 0.4  | 1.2 ± 0.3  | 1.4 ± 0.4  | 1.8 ± 0.4  | 1.7 ± 0.4  | 1.9 ± 0.5  | 1.6 ± 0.5  | 1.7 ± 0.5  |
| Compound7n-crystal  | 0.4  | 2.0 ± 0.3  | 2.0 ± 0.3  | 1.9 ± 0.3  | 1.9 ± 0.3  | 1.8 ± 0.3  | 1.6 ± 0.3  | 1.7 ± 0.3  | 1.4 ± 0.3  | 1.5 ± 0.3  | 1.6 ± 0.3  | 1.5 ± 0.3  |
| Compound7n-con1     | 2.4  | 1.9 ± 0.2  | 1.9 ± 0.2  | 1.8 ± 0.2  | 1.8 ± 0.2  | 1.8 ± 0.2  | 1.9 ± 0.3  | 1.8 ± 0.2  | 2.0 ± 0.4  | 2.3 ± 0.4  | 2.0 ± 0.4  | 2.0 ± 0.4  |
| Compound7n-con2     | 3.5  | 2.9 ± 0.1  | 3.0 ± 0.2  | 3.0 ± 0.2  | 3.1 ± 0.2  | 3.0 ± 0.2  | 3.1 ± 0.2  | 3.2 ± 0.2  | 3.0 ± 0.2  | 3.0 ± 0.2  | 3.1 ± 0.2  | 3.1 ± 0.2  |
| Compound7n-con3     | 13.1 | 12.5 ± 0.2 | 12.5 ± 0.2 | 12.6 ± 0.1 | 12.6 ± 0.2 | 12.6 ± 0.2 | 13.0 ± 0.3 | 12.7 ± 0.2 | 12.6 ± 0.2 | 12.9 ± 0.2 | 12.8 ± 0.3 | 12.8 ± 0.3 |
| Compound7n-con4     | 2.0  | 2.1 ± 0.1  | 2.0 ± 0.2  | 2.0 ± 0.3  | 1.9 ± 0.3  | 1.8 ± 0.3  | 1.8 ± 0.3  | 1.8 ± 0.3  | 1.6 ± 0.4  | 1.3 ± 0.3  | 1.7 ± 0.4  | 1.6 ± 0.4  |
| Dovitinib-crystal   | 0.3  | 1.4 ± 0.3  | 1.4 ± 0.3  | 1.3 ± 0.3  | 1.2 ± 0.3  | 1.3 ± 0.3  | 1.1 ± 0.3  | 1.1 ± 0.3  | 1.3 ± 0.2  | 1.1 ± 0.2  | 1.2 ± 0.3  | 1.2 ± 0.2  |
| Dovitinib-con1      | 0.7  | 1.3 ± 0.2  | 1.3 ± 0.2  | 1.4 ± 0.3  | 1.4 ± 0.3  | 1.4 ± 0.3  | 1.1 ± 0.2  | 1.1 ± 0.2  | 1.1 ± 0.2  | 1.1 ± 0.3  | 1.2 ± 0.3  | 1.1 ± 0.2  |
| Dovitinib-con2      | 12.3 | 15.4 ± 0.2 | 15.4 ± 0.2 | 15.6 ± 0.3 | 15.5 ± 0.4 | 15.4 ± 0.6 | 15.1 ± 1.1 | 15.0 ± 0.5 | 14.9 ± 0.2 | 15.0 ± 0.3 | 15.1 ± 0.7 | 15.0 ± 0.7 |
| Dovitinib-con3      | 10.6 | 10.4 ± 0.1 | 10.3 ± 0.2 | 10.3 ± 0.2 | 10.3 ± 0.2 | 10.3 ± 0.2 | 10.1 ± 0.1 | 10.0 ± 0.1 | 10.1 ± 0.1 | 10.1 ± 0.1 | 10.1 ± 0.3 | 10.1 ± 0.1 |
| Compound6-crystal   | 0.5  | 1.2 ± 0.3  | 1.2 ± 0.3  | 1.2 ± 0.3  | 1.3 ± 0.3  | 1.3 ± 0.3  | 1.4 ± 0.3  | 1.5 ± 0.2  | 1.5 ± 0.3  | 1.3 ± 0.2  | 1.4 ± 0.3  | 1.4 ± 0.3  |
| Compound6-con1      | 3.8  | 3.6 ± 0.2  | 3.7 ± 0.2  | 3.9 ± 0.3  | 4.0 ± 0.3  | 4.0 ± 0.3  | 5.9 ± 1.2  | 6.2 ± 1.4  | 5.2 ± 0.4  | 4.6 ± 0.4  | 5.2 ± 1.2  | 5.5 ± 1.1  |
| Compound6-con2      | 4.7  | 6.7 ± 0.2  | 6.9 ± 0.3  | 7.0 ± 0.2  | 6.9 ± 0.2  | 7.0 ± 0.2  | 7.1 ± 0.2  | 7.0 ± 0.2  | 7.0 ± 0.2  | 6.6 ± 0.3  | 6.9 ± 0.3  | 6.9 ± 0.3  |
| Compound6-con3      | 6.7  | 7.9 ± 0.3  | 7.7 ± 0.4  | 8.1 ± 0.6  | 8.1 ± 0.7  | 8.8 ± 1.0  | 8.7 ± 0.6  | 9.0 ± 1.4  | 11.1 ± 1.2 | 10.7 ± 0.8 | 9.7 ± 1.5  | 9.9 ± 1.5  |
| Compound6-con4      | 6.6  | 10.2 ± 0.4 | 10.3 ± 0.4 | 10.4 ± 0.5 | 10.3 ± 0.4 | 10.1 ± 0.4 | 10.1 ± 0.3 | 10.1 ± 0.4 | 10.0 ± 0.3 | 9.9 ± 0.4  | 10.0 ± 0.4 | 10.0 ± 0.4 |
| Erdafitinib-crystal | 0.3  | 1.2 ± 0.2  | 1.3 ± 0.2  | 1.3 ± 0.3  | 1.1 ± 0.3  | 1.0 ± 0.3  | 0.9 ± 0.2  | 0.9 ± 0.2  | 0.9 ± 0.2  | 0.8 ± 0.2  | 0.9 ± 0.2  | 0.9 ± 0.2  |

|                    |     |           |           |           |           |           |           |           |           |           |           |           |
|--------------------|-----|-----------|-----------|-----------|-----------|-----------|-----------|-----------|-----------|-----------|-----------|-----------|
| Erdafitinib-con1   | 1.8 | 1.4 ± 0.1 | 1.4 ± 0.1 | 1.4 ± 0.2 | 1.6 ± 0.2 | 1.8 ± 0.3 | 1.9 ± 0.3 | 1.8 ± 0.2 | 1.8 ± 0.2 | 1.9 ± 3.3 | 1.9 ± 1.5 | 1.9 ± 1.7 |
| Erdafitinib-con2   | 4.9 | 4.9 ± 0.2 | 5.0 ± 0.2 | 5.1 ± 0.2 | 5.2 ± 0.2 | 5.2 ± 0.2 | 5.2 ± 0.1 | 5.1 ± 0.1 | 5.0 ± 0.1 | 5.0 ± 0.1 | 5.1 ± 0.2 | 5.1 ± 0.1 |
| Erdafitinib-con3   | 2.7 | 2.9 ± 0.1 | 2.9 ± 0.1 | 2.9 ± 0.1 | 2.8 ± 0.1 | 2.9 ± 0.1 | 2.9 ± 0.1 | 2.8 ± 0.1 | 2.7 ± 0.1 | 2.7 ± 0.1 | 2.8 ± 0.2 | 2.8 ± 0.1 |
| Erdafitinib-con4   | 1.9 | 1.8 ± 0.3 | 1.9 ± 0.3 | 1.8 ± 0.3 | 1.6 ± 0.3 | 1.4 ± 0.3 | 1.3 ± 0.2 | 1.3 ± 0.2 | 1.3 ± 0.2 | 1.3 ± 0.2 | 1.3 ± 0.2 | 1.3 ± 0.2 |
| Lenvatinib-crystal | 0.5 | 1.3 ± 0.2 | 1.3 ± 0.2 | 1.4 ± 0.3 | 1.3 ± 0.3 | 1.3 ± 0.3 | 1.2 ± 0.3 | 1.3 ± 0.3 | 1.4 ± 0.3 | 1.2 ± 0.3 | 1.3 ± 0.3 | 1.3 ± 0.3 |
| Lenvatinib-con1    | 4.3 | 6.5 ± 0.3 | 6.4 ± 0.2 | 6.7 ± 0.6 | 7.3 ± 0.8 | 7.5 ± 0.7 | 7.2 ± 0.7 | 7.5 ± 0.5 | 8.0 ± 1.1 | 9.4 ± 0.5 | 7.9 ± 1.1 | 8.1 ± 1.1 |
| Lenvatinib-con2    | 5.2 | 5.1 ± 0.2 | 5.1 ± 0.3 | 5.3 ± 0.4 | 5.4 ± 0.4 | 5.4 ± 0.4 | 5.3 ± 0.3 | 6.8 ± 1.3 | 8.0 ± 0.5 | 7.9 ± 0.5 | 6.7 ± 1.4 | 7.0 ± 1.3 |
| Lenvatinib-con3    | 5.6 | 5.0 ± 0.2 | 5.1 ± 0.2 | 5.1 ± 0.2 | 5.1 ± 0.2 | 5.1 ± 0.3 | 5.2 ± 0.2 | 5.4 ± 0.2 | 5.4 ± 0.2 | 5.5 ± 0.2 | 5.3 ± 0.3 | 5.4 ± 0.2 |
| Lenvatinib-con4    | 2.4 | 2.5 ± 0.2 | 2.5 ± 0.2 | 2.5 ± 0.2 | 1.9 ± 0.7 | 1.5 ± 0.6 | 1.3 ± 0.2 | 1.3 ± 0.2 | 1.3 ± 0.2 | 1.3 ± 0.3 | 1.3 ± 0.4 | 1.3 ± 0.2 |

**Table S8.** The RMSD<sup>B</sup> (against the starting structure of the production MD simulation) of each ligand at different timescales of the MD simulation. Values are reported in form of means  $\pm$  standard deviation. The error bars for 0-100 ns and 20-100 ns results were calculated using the standard deviation of the values of 0-20 ns, 20-40 ns, 40-60 ns, 60-80 ns and 80-100 ns MD simulation. Unit: Å.

|                   | 0-1 ns        | 0-2 ns        | 0-5 ns        | 0-10 ns       | 0-20 ns       | 20-40 ns      | 40-60 ns      | 60-80 ns      | 80-100 ns     | 0-100 ns      | 20-100 ns     |
|-------------------|---------------|---------------|---------------|---------------|---------------|---------------|---------------|---------------|---------------|---------------|---------------|
| ARQ-069-crystal   | 0.8 $\pm$ 0.2 | 1.0 $\pm$ 0.3 | 1.2 $\pm$ 0.3 | 1.2 $\pm$ 0.3 | 1.2 $\pm$ 0.3 | 1.3 $\pm$ 0.4 | 1.5 $\pm$ 0.4 | 1.2 $\pm$ 0.4 | 1.2 $\pm$ 0.4 | 1.3 $\pm$ 0.4 | 1.3 $\pm$ 0.4 |
| ARQ-069-con1      | 0.5 $\pm$ 0.1 | 0.5 $\pm$ 0.1 | 0.6 $\pm$ 0.2 | 0.5 $\pm$ 0.2 | 0.6 $\pm$ 0.2 | 1.1 $\pm$ 0.4 | 1.1 $\pm$ 0.5 | 1.6 $\pm$ 0.3 | 1.4 $\pm$ 0.4 | 1.2 $\pm$ 0.5 | 1.3 $\pm$ 0.5 |
| ARQ-069-con2      | 0.8 $\pm$ 0.3 | 1.1 $\pm$ 0.3 | 1.4 $\pm$ 0.5 | 1.9 $\pm$ 0.6 | 1.8 $\pm$ 0.7 | 1.5 $\pm$ 0.5 | 1.6 $\pm$ 0.4 | 1.6 $\pm$ 0.4 | 1.7 $\pm$ 0.4 | 1.6 $\pm$ 0.5 | 1.6 $\pm$ 0.4 |
| ARQ-069-con3      | 1.2 $\pm$ 0.3 | 1.2 $\pm$ 0.3 | 1.2 $\pm$ 0.3 | 1.2 $\pm$ 0.3 | 1.8 $\pm$ 1.1 | 5.5 $\pm$ 1.1 | 6.9 $\pm$ 0.3 | 6.5 $\pm$ 0.8 | 5.5 $\pm$ 0.7 | 5.2 $\pm$ 2.0 | 6.1 $\pm$ 1.0 |
| ARQ-069-con4      | 0.6 $\pm$ 0.1 | 0.7 $\pm$ 0.2 | 0.8 $\pm$ 0.3 | 0.8 $\pm$ 0.2 | 0.8 $\pm$ 0.2 | 0.9 $\pm$ 0.3 | 0.9 $\pm$ 0.3 | 1.0 $\pm$ 0.3 | 1.1 $\pm$ 0.3 | 0.9 $\pm$ 0.3 | 1.0 $\pm$ 0.3 |
| CH5183284-crystal | 1.0 $\pm$ 0.2 | 1.1 $\pm$ 0.3 | 1.1 $\pm$ 0.3 | 1.0 $\pm$ 0.3 | 1.1 $\pm$ 0.3 | 1.1 $\pm$ 0.3 | 1.2 $\pm$ 0.3 | 1.2 $\pm$ 0.3 | 1.3 $\pm$ 0.3 | 1.2 $\pm$ 0.3 | 1.2 $\pm$ 0.3 |
| CH5183284-con1    | 0.9 $\pm$ 0.2 | 1.1 $\pm$ 0.3 | 1.3 $\pm$ 0.3 | 1.4 $\pm$ 0.4 | 1.5 $\pm$ 0.4 | 1.8 $\pm$ 0.5 | 1.9 $\pm$ 0.3 | 1.9 $\pm$ 0.3 | 1.9 $\pm$ 0.4 | 1.8 $\pm$ 0.4 | 1.9 $\pm$ 0.4 |
| CH5183284-con2    | 0.7 $\pm$ 0.3 | 0.7 $\pm$ 0.3 | 1.1 $\pm$ 0.5 | 1.3 $\pm$ 0.6 | 1.5 $\pm$ 0.6 | 1.9 $\pm$ 0.5 | 1.9 $\pm$ 0.4 | 2.2 $\pm$ 0.5 | 2.2 $\pm$ 0.3 | 1.9 $\pm$ 0.5 | 2.0 $\pm$ 0.5 |
| CH5183284-con3    | 0.8 $\pm$ 0.2 | 0.8 $\pm$ 0.2 | 1.0 $\pm$ 0.3 | 1.0 $\pm$ 0.3 | 1.0 $\pm$ 0.3 | 1.8 $\pm$ 0.9 | 2.6 $\pm$ 0.5 | 2.4 $\pm$ 0.4 | 2.3 $\pm$ 0.4 | 2.0 $\pm$ 0.8 | 2.3 $\pm$ 0.7 |
| CH5183284-con4    | 0.8 $\pm$ 0.2 | 0.9 $\pm$ 0.2 | 0.9 $\pm$ 0.3 | 0.9 $\pm$ 0.3 | 1.0 $\pm$ 0.3 | 0.8 $\pm$ 0.2 | 1.0 $\pm$ 0.3 | 0.9 $\pm$ 0.2 | 0.9 $\pm$ 0.3 | 0.9 $\pm$ 0.3 | 0.9 $\pm$ 0.3 |
| E-3810-crystal    | 0.9 $\pm$ 0.3 | 0.9 $\pm$ 0.2 | 0.9 $\pm$ 0.2 | 1.0 $\pm$ 0.2 | 1.0 $\pm$ 0.3 | 1.0 $\pm$ 0.2 |
| E-3810-con1       | 1.3 $\pm$ 0.3 | 1.3 $\pm$ 0.2 | 1.4 $\pm$ 0.3 | 1.3 $\pm$ 0.2 | 1.3 $\pm$ 0.2 | 1.3 $\pm$ 0.3 |
| E-3810-con2       | 1.0 $\pm$ 0.3 | 1.0 $\pm$ 0.2 | 1.1 $\pm$ 0.3 | 1.3 $\pm$ 0.4 | 2.8 $\pm$ 1.7 | 4.5 $\pm$ 0.4 | 4.7 $\pm$ 0.3 | 4.6 $\pm$ 0.3 | 4.6 $\pm$ 0.3 | 4.2 $\pm$ 1.1 | 4.6 $\pm$ 0.3 |
| E-3810-con3       | 1.0 $\pm$ 0.3 | 1.0 $\pm$ 0.3 | 1.1 $\pm$ 0.3 | 1.2 $\pm$ 0.3 | 2.0 $\pm$ 1.1 | 4.5 $\pm$ 1.3 | 3.3 $\pm$ 0.3 | 3.4 $\pm$ 0.5 | 3.7 $\pm$ 0.8 | 3.4 $\pm$ 1.2 | 3.7 $\pm$ 0.9 |
| E3810-con4        | 0.9 $\pm$ 0.2 | 1.0 $\pm$ 0.2 | 1.0 $\pm$ 0.2 | 1.0 $\pm$ 0.2 | 1.0 $\pm$ 0.2 | 1.1 $\pm$ 0.3 | 1.0 $\pm$ 0.2 | 1.0 $\pm$ 0.2 | 1.0 $\pm$ 0.2 | 1.0 $\pm$ 0.3 | 1.1 $\pm$ 0.3 |
| LY2874455-crystal | 1.2 $\pm$ 0.2 | 1.2 $\pm$ 0.2 | 1.1 $\pm$ 0.3 | 1.2 $\pm$ 0.3 | 1.3 $\pm$ 0.3 | 1.5 $\pm$ 0.2 | 1.6 $\pm$ 0.2 | 1.5 $\pm$ 0.3 | 1.2 $\pm$ 0.6 | 1.4 $\pm$ 0.4 | 1.4 $\pm$ 0.4 |
| LY2874455-con1    | 0.9 $\pm$ 0.2 | 0.9 $\pm$ 0.2 | 1.0 $\pm$ 0.2 | 1.0 $\pm$ 0.2 | 1.4 $\pm$ 0.6 | 2.0 $\pm$ 0.3 | 2.3 $\pm$ 0.5 | 3.1 $\pm$ 0.5 | 2.4 $\pm$ 0.4 | 2.2 $\pm$ 0.7 | 2.4 $\pm$ 0.6 |
| LY2874455-con2    | 1.7 $\pm$ 0.5 | 2.0 $\pm$ 0.5 | 1.7 $\pm$ 0.4 | 1.8 $\pm$ 0.4 | 1.8 $\pm$ 0.4 | 1.9 $\pm$ 0.5 | 2.1 $\pm$ 0.5 | 1.6 $\pm$ 0.3 | 2.0 $\pm$ 0.5 | 1.9 $\pm$ 0.5 | 1.9 $\pm$ 0.5 |
| LY2874455-con3    | 1.3 $\pm$ 0.4 | 2.0 $\pm$ 0.8 | 2.0 $\pm$ 0.6 | 2.0 $\pm$ 0.5 | 2.2 $\pm$ 0.6 | 2.3 $\pm$ 0.4 | 2.3 $\pm$ 0.4 | 2.3 $\pm$ 0.4 | 2.4 $\pm$ 0.4 | 2.4 $\pm$ 0.4 | 2.4 $\pm$ 0.4 |

|                     |           |           |           |           |           |           |           |           |           |           |           |
|---------------------|-----------|-----------|-----------|-----------|-----------|-----------|-----------|-----------|-----------|-----------|-----------|
| LY2874455-con4      | 1.0 ± 0.3 | 1.1 ± 0.3 | 1.1 ± 0.3 | 1.4 ± 0.5 | 1.8 ± 0.6 | 1.9 ± 0.4 | 2.2 ± 0.4 | 2.3 ± 0.4 | 2.5 ± 0.2 | 2.1 ± 0.5 | 2.2 ± 0.4 |
| AZD4547-crystal     | 1.1 ± 0.4 | 1.4 ± 0.5 | 1.7 ± 0.4 | 1.8 ± 0.3 | 1.8 ± 0.4 | 1.9 ± 0.4 | 1.9 ± 0.4 | 1.6 ± 0.3 | 1.8 ± 0.4 | 1.8 ± 0.4 | 1.8 ± 0.4 |
| AZD4547-con1        | 0.8 ± 0.2 | 0.8 ± 0.2 | 0.9 ± 0.2 | 0.9 ± 0.2 | 1.0 ± 0.3 | 1.5 ± 0.4 | 1.4 ± 0.5 | 1.1 ± 0.4 | 1.3 ± 0.4 | 1.2 ± 0.5 | 1.3 ± 0.5 |
| AZD4547-con2        | 0.8 ± 0.2 | 1.0 ± 0.5 | 2.2 ± 1.1 | 2.1 ± 1.0 | 2.0 ± 0.8 | 2.0 ± 0.4 | 1.7 ± 0.6 | 1.8 ± 0.5 | 1.8 ± 0.4 | 1.9 ± 0.6 | 1.8 ± 0.5 |
| AZD4547-con3        | 1.1 ± 0.2 | 1.2 ± 0.3 | 1.3 ± 0.3 | 1.4 ± 0.3 | 1.5 ± 0.4 | 1.6 ± 0.4 | 1.6 ± 0.4 | 1.7 ± 0.4 | 2.0 ± 0.4 | 1.7 ± 0.4 | 1.7 ± 0.4 |
| AZD4547-con4        | 1.0 ± 0.2 | 1.1 ± 0.2 | 1.1 ± 0.2 | 1.3 ± 0.3 | 1.2 ± 0.3 | 1.3 ± 0.3 | 1.7 ± 0.4 | 1.5 ± 0.4 | 1.5 ± 0.6 | 1.4 ± 0.5 | 1.5 ± 0.5 |
| Compound7n-crystal  | 2.5 ± 0.6 | 2.3 ± 0.6 | 2.1 ± 0.5 | 2.1 ± 0.5 | 2.0 ± 0.4 | 2.0 ± 0.4 | 2.0 ± 0.4 | 2.1 ± 0.4 | 2.4 ± 0.4 | 2.1 ± 0.4 | 2.2 ± 0.4 |
| Compound7n-con1     | 1.2 ± 0.2 | 1.6 ± 0.5 | 1.5 ± 0.4 | 1.5 ± 0.4 | 1.4 ± 0.4 | 2.0 ± 0.5 | 1.7 ± 0.4 | 1.9 ± 0.4 | 2.6 ± 0.4 | 1.9 ± 0.6 | 2.0 ± 0.6 |
| Compound7n-con2     | 1.0 ± 0.2 | 1.2 ± 0.4 | 1.2 ± 0.4 | 1.4 ± 0.5 | 1.4 ± 0.4 | 1.6 ± 0.4 | 1.8 ± 0.3 | 1.4 ± 0.4 | 1.4 ± 0.3 | 1.5 ± 0.4 | 1.6 ± 0.4 |
| Compound7n-con3     | 2.2 ± 0.6 | 2.4 ± 0.5 | 2.6 ± 0.5 | 2.6 ± 0.5 | 2.6 ± 0.5 | 3.8 ± 0.8 | 4.0 ± 0.6 | 4.4 ± 0.7 | 3.2 ± 0.4 | 3.6 ± 0.9 | 3.9 ± 0.8 |
| Compound7n-con4     | 0.9 ± 0.3 | 1.2 ± 0.5 | 1.7 ± 0.5 | 1.8 ± 0.4 | 1.9 ± 0.4 | 2.1 ± 0.3 | 2.1 ± 0.4 | 2.1 ± 0.3 | 2.3 ± 0.2 | 2.1 ± 0.4 | 2.2 ± 0.3 |
| Dovitinib-crystal   | 1.2 ± 0.3 | 1.3 ± 0.3 | 1.1 ± 0.3 | 1.2 ± 0.3 | 1.3 ± 0.4 | 1.4 ± 0.3 | 1.6 ± 0.3 | 2.0 ± 0.3 | 1.5 ± 0.3 | 1.6 ± 0.4 | 1.6 ± 0.4 |
| Dovitinib-con1      | 1.0 ± 0.2 | 1.0 ± 0.2 | 1.0 ± 0.3 | 1.1 ± 0.3 | 1.3 ± 0.3 | 1.2 ± 0.2 | 1.2 ± 0.2 | 1.3 ± 0.2 | 1.2 ± 0.2 | 1.3 ± 0.2 | 1.3 ± 0.2 |
| Dovitinib-con2      | 0.9 ± 0.2 | 1.0 ± 0.2 | 1.3 ± 0.4 | 1.9 ± 0.8 | 2.6 ± 1.0 | 4.2 ± 0.8 | 2.8 ± 0.6 | 2.3 ± 0.3 | 2.5 ± 0.3 | 2.9 ± 0.9 | 3.0 ± 0.9 |
| Dovitinib-con3      | 1.0 ± 0.3 | 1.0 ± 0.3 | 1.0 ± 0.3 | 1.0 ± 0.3 | 1.0 ± 0.3 | 1.9 ± 0.3 | 2.0 ± 0.3 | 2.2 ± 0.2 | 2.3 ± 0.2 | 1.9 ± 0.5 | 2.1 ± 0.3 |
| Erdafitinib-crystal | 0.7 ± 0.1 | 0.8 ± 0.1 | 0.8 ± 0.2 | 1.0 ± 0.3 | 1.1 ± 0.3 | 1.2 ± 0.3 | 1.3 ± 0.3 | 1.1 ± 0.3 | 1.2 ± 0.3 | 1.2 ± 0.3 | 1.2 ± 0.3 |
| Erdafitinib-con1    | 0.7 ± 0.2 | 0.7 ± 0.1 | 0.8 ± 0.2 | 0.9 ± 0.3 | 1.1 ± 0.3 | 1.2 ± 0.2 | 1.2 ± 0.2 | 1.2 ± 0.2 | 1.4 ± 3.3 | 1.2 ± 1.6 | 1.3 ± 1.7 |
| Erdafitinib-con2    | 1.3 ± 0.5 | 1.6 ± 0.5 | 2.0 ± 0.5 | 2.2 ± 0.5 | 2.4 ± 0.4 | 2.6 ± 0.3 | 2.0 ± 0.4 | 1.5 ± 0.2 | 1.9 ± 0.4 | 2.1 ± 0.5 | 2.0 ± 0.5 |
| Erdafitinib-con3    | 1.1 ± 0.2 | 1.0 ± 0.3 | 1.0 ± 0.3 | 1.1 ± 0.3 | 1.1 ± 0.3 | 1.2 ± 0.3 | 1.3 ± 0.3 | 1.2 ± 0.3 | 1.1 ± 0.2 | 1.2 ± 0.3 | 1.2 ± 0.3 |
| Erdafitinib-con4    | 0.7 ± 0.2 | 0.8 ± 0.2 | 0.8 ± 0.2 | 1.1 ± 0.3 | 1.3 ± 0.4 | 1.5 ± 0.3 | 1.6 ± 0.3 | 1.5 ± 0.3 | 1.5 ± 0.3 | 1.5 ± 0.3 | 1.5 ± 0.3 |
| Compound6-crystal   | 0.9 ± 0.3 | 0.9 ± 0.3 | 0.9 ± 0.2 | 0.9 ± 0.3 | 0.9 ± 0.2 | 1.1 ± 0.3 | 1.2 ± 0.3 | 1.2 ± 0.3 | 1.0 ± 0.3 | 1.1 ± 0.3 | 1.1 ± 0.3 |



|                    |           |           |           |           |           |           |            |            |           |           |            |
|--------------------|-----------|-----------|-----------|-----------|-----------|-----------|------------|------------|-----------|-----------|------------|
| Compound6-con1     | 0.9 ± 0.2 | 0.8 ± 0.2 | 0.9 ± 0.2 | 1.0 ± 0.2 | 1.1 ± 0.2 | 5.0 ± 1.6 | 5.4 ± 1.0  | 5.0 ± 0.3  | 4.4 ± 0.3 | 4.1 ± 1.8 | 4.9 ± 1.1  |
| Compound6-con2     | 1.5 ± 0.3 | 1.3 ± 0.3 | 1.3 ± 0.4 | 1.3 ± 0.4 | 1.3 ± 0.3 | 1.4 ± 0.5 | 1.5 ± 0.4  | 1.7 ± 0.4  | 2.0 ± 0.3 | 1.6 ± 0.5 | 1.7 ± 0.5  |
| Compound6-con3     | 0.7 ± 0.2 | 0.8 ± 0.3 | 1.3 ± 0.8 | 2.2 ± 1.2 | 4.1 ± 2.2 | 7.8 ± 1.5 | 11.5 ± 1.8 | 11.7 ± 2.1 | 9.1 ± 1.5 | 8.8 ± 3.3 | 10.1 ± 2.4 |
| Compound6-con4     | 1.2 ± 0.4 | 1.5 ± 0.5 | 1.8 ± 0.6 | 2.1 ± 0.5 | 2.3 ± 0.4 | 2.3 ± 0.2 | 2.3 ± 0.3  | 2.3 ± 0.3  | 2.2 ± 0.3 | 2.3 ± 0.3 | 2.3 ± 0.3  |
| Lenvatinib-crystal | 0.8 ± 0.2 | 0.8 ± 0.2 | 1.1 ± 0.3 | 1.3 ± 0.4 | 1.3 ± 0.3 | 1.4 ± 0.3 | 1.5 ± 0.4  | 1.7 ± 0.4  | 1.6 ± 0.4 | 1.5 ± 0.4 | 1.6 ± 0.4  |
| Lenvatinib-con1    | 0.9 ± 0.2 | 0.8 ± 0.2 | 0.9 ± 0.2 | 1.0 ± 0.3 | 1.0 ± 0.3 | 0.9 ± 0.2 | 1.0 ± 0.3  | 1.3 ± 0.3  | 1.2 ± 0.3 | 1.1 ± 0.3 | 1.1 ± 0.3  |
| Lenvatinib-con2    | 0.9 ± 0.2 | 1.0 ± 0.4 | 1.6 ± 0.8 | 2.1 ± 0.8 | 2.4 ± 1.0 | 2.2 ± 0.7 | 3.6 ± 1.1  | 4.3 ± 0.7  | 4.1 ± 0.7 | 3.3 ± 1.2 | 3.5 ± 1.1  |
| Lenvatinib-con3    | 1.0 ± 0.2 | 1.1 ± 0.3 | 1.6 ± 0.8 | 2.1 ± 0.8 | 2.9 ± 0.9 | 3.0 ± 0.8 | 3.7 ± 0.8  | 5.4 ± 0.6  | 5.9 ± 0.5 | 4.1 ± 1.5 | 4.5 ± 1.4  |
| Lenvatinib-con4    | 0.9 ± 0.2 | 0.9 ± 0.2 | 0.9 ± 0.2 | 1.7 ± 0.9 | 2.1 ± 0.8 | 2.8 ± 0.3 | 2.9 ± 0.3  | 2.6 ± 0.3  | 2.7 ± 0.4 | 2.6 ± 0.5 | 2.7 ± 0.3  |
| ASP-5878-con1      | 0.9 ± 0.3 | 1.0 ± 0.2 | 1.2 ± 0.3 | 1.2 ± 0.3 | 1.2 ± 0.3 | 1.3 ± 0.3 | 1.0 ± 0.2  | 1.1 ± 0.2  | 1.1 ± 0.2 | 1.1 ± 0.3 | 1.1 ± 0.2  |
| ASP-5878-con2      | 2.8 ± 0.4 | 2.7 ± 0.4 | 3.3 ± 1.0 | 3.8 ± 0.9 | 4.2 ± 0.8 | 5.3 ± 0.7 | 4.4 ± 0.2  | 4.1 ± 0.5  | 3.7 ± 0.2 | 4.3 ± 0.8 | 4.4 ± 0.8  |
| ASP-5878-con3      | 1.4 ± 0.3 | 1.3 ± 0.4 | 1.4 ± 0.4 | 1.5 ± 0.3 | 1.4 ± 0.3 | 1.8 ± 0.4 | 2.2 ± 0.1  | 2.2 ± 0.1  | 2.2 ± 0.2 | 2.0 ± 0.4 | 2.1 ± 0.3  |
| E-7090-con1        | 1.7 ± 0.2 | 1.4 ± 0.3 | 1.4 ± 0.3 | 1.3 ± 0.3 | 1.4 ± 0.4 | 2.2 ± 0.5 | 2.3 ± 0.5  | 2.3 ± 0.4  | 2.8 ± 0.5 | 2.2 ± 0.6 | 2.4 ± 0.5  |
| E-7090-con3        | 1.9 ± 0.6 | 1.7 ± 0.5 | 1.5 ± 0.5 | 1.5 ± 0.4 | 1.8 ± 0.5 | 1.8 ± 0.5 | 2.1 ± 0.6  | 2.2 ± 0.5  | 2.3 ± 0.3 | 2.0 ± 0.5 | 2.1 ± 0.5  |
| WO2013129369-con1  | 1.2 ± 0.2 | 1.3 ± 0.2 | 1.3 ± 0.3 | 1.5 ± 0.3 | 1.4 ± 0.3 | 1.5 ± 0.3 | 1.5 ± 0.3  | 1.5 ± 0.3  | 1.7 ± 0.3 | 1.5 ± 0.3 | 1.5 ± 0.3  |
| WO2013129369-con2  | 0.9 ± 0.2 | 1.3 ± 0.5 | 1.6 ± 0.5 | 1.7 ± 0.4 | 1.8 ± 0.4 | 1.7 ± 0.3 | 1.6 ± 0.7  | 2.8 ± 0.6  | 3.2 ± 0.2 | 2.2 ± 0.8 | 2.3 ± 0.9  |
| WO2014139465-con1  | 1.1 ± 0.2 | 1.0 ± 0.2 | 1.3 ± 0.4 | 1.4 ± 0.4 | 1.2 ± 0.4 | 1.1 ± 0.3 | 1.2 ± 0.2  | 1.2 ± 0.3  | 1.2 ± 0.3 | 1.2 ± 0.3 | 1.2 ± 0.3  |
| WO2014139465-con2  | 2.4 ± 0.7 | 3.0 ± 0.8 | 3.3 ± 0.7 | 3.3 ± 0.6 | 3.7 ± 0.8 | 4.3 ± 0.8 | 3.6 ± 0.5  | 3.7 ± 0.6  | 4.5 ± 0.3 | 4.0 ± 0.7 | 4.0 ± 0.7  |
| ARQ-087-con1       | 0.5 ± 0.1 | 0.5 ± 0.1 | 0.9 ± 0.4 | 1.2 ± 0.4 | 1.3 ± 0.3 | 1.4 ± 0.1 | 1.4 ± 0.1  | 1.4 ± 0.1  | 1.4 ± 0.1 | 1.4 ± 0.2 | 1.4 ± 0.1  |
| ARQ-087-con2       | 0.6 ± 0.2 | 0.8 ± 0.2 | 0.8 ± 0.2 | 0.8 ± 0.2 | 0.9 ± 0.3 | 0.9 ± 0.2 | 0.8 ± 0.3  | 1.2 ± 0.4  | 1.1 ± 0.2 | 1.0 ± 0.4 | 1.0 ± 0.4  |

|                   |           |           |           |           |           |            |           |            |            |            |            |
|-------------------|-----------|-----------|-----------|-----------|-----------|------------|-----------|------------|------------|------------|------------|
| IJMS-6-con1       | 0.8 ± 0.3 | 0.8 ± 0.3 | 1.0 ± 0.4 | 1.2 ± 0.5 | 1.2 ± 0.5 | 2.1 ± 1.2  | 3.4 ± 0.8 | 2.8 ± 0.3  | 2.7 ± 0.4  | 2.4 ± 1.0  | 2.7 ± 0.9  |
| IJMS-6-con2       | 0.9 ± 0.2 | 1.0 ± 0.3 | 1.0 ± 0.3 | 1.1 ± 0.3 | 1.0 ± 0.3 | 0.9 ± 0.2  | 1.0 ± 0.2 | 1.1 ± 0.2  | 1.1 ± 0.2  | 1.0 ± 0.3  | 1.0 ± 0.2  |
| IJMS-42-con1      | 1.7 ± 0.7 | 2.0 ± 0.7 | 2.6 ± 1.2 | 2.2 ± 1.0 | 2.6 ± 1.0 | 3.8 ± 0.7  | 3.9 ± 0.5 | 3.9 ± 0.5  | 3.6 ± 0.5  | 3.6 ± 0.8  | 3.8 ± 0.6  |
| IJMS-42-con2      | 1.4 ± 0.4 | 1.3 ± 0.3 | 1.3 ± 0.3 | 1.4 ± 0.4 | 1.6 ± 0.6 | 1.2 ± 0.3  | 1.9 ± 0.8 | 2.8 ± 0.7  | 1.7 ± 0.8  | 1.8 ± 0.8  | 1.9 ± 0.9  |
| IJMS-92-con1      | 0.7 ± 0.2 | 0.8 ± 0.2 | 0.9 ± 0.3 | 1.4 ± 0.9 | 1.3 ± 0.7 | 1.0 ± 0.3  | 1.0 ± 0.3 | 0.8 ± 0.2  | 0.9 ± 0.3  | 1.0 ± 0.4  | 0.9 ± 0.3  |
| IJMS-92-con2      | 1.3 ± 0.3 | 1.2 ± 0.3 | 1.1 ± 0.3 | 1.1 ± 0.3 | 1.1 ± 0.3 | 1.2 ± 0.4  | 1.1 ± 0.4 | 1.3 ± 0.3  | 1.4 ± 0.4  | 1.2 ± 0.4  | 1.3 ± 0.4  |
| IJMS-96-con1      | 1.5 ± 0.1 | 1.5 ± 0.1 | 1.6 ± 0.1 | 1.6 ± 0.2 | 1.8 ± 0.3 | 3.4 ± 0.7  | 3.3 ± 0.6 | 3.8 ± 0.4  | 3.5 ± 0.7  | 3.1 ± 0.9  | 3.5 ± 0.6  |
| IJMS-96-con2      | 1.2 ± 0.4 | 1.3 ± 0.3 | 1.5 ± 0.3 | 2.0 ± 0.8 | 2.2 ± 0.6 | 3.1 ± 1.3  | 4.4 ± 0.4 | 6.3 ± 1.4  | 6.7 ± 0.5  | 4.5 ± 2.0  | 5.1 ± 1.8  |
| IJMS-99-con1      | 1.8 ± 0.4 | 2.8 ± 1.3 | 3.2 ± 1.3 | 3.9 ± 1.7 | 5.7 ± 2.5 | 11.2 ± 1.7 | 11 ± 1.0  | 11.4 ± 0.5 | 11.8 ± 0.4 | 10.2 ± 2.7 | 11.3 ± 1.1 |
| IJMS-99-con2      | 1.0 ± 0.3 | 1.4 ± 0.5 | 1.8 ± 0.5 | 1.6 ± 0.5 | 1.3 ± 0.5 | 1.2 ± 0.4  | 1.2 ± 0.4 | 1.5 ± 0.6  | 1.1 ± 0.3  | 1.3 ± 0.5  | 1.3 ± 0.5  |
| ZINC17342632-con1 | 1.0 ± 0.2 | 2.0 ± 1.3 | 3.2 ± 1.3 | 3.6 ± 1.0 | 3.8 ± 0.8 | 4.1 ± 0.3  | 6.1 ± 1.0 | 6.9 ± 0.9  | 9.2 ± 0.9  | 6.0 ± 2.1  | 6.6 ± 2.0  |
| ZINC2542634-con1  | 1.5 ± 0.4 | 1.5 ± 0.4 | 1.6 ± 0.4 | 1.7 ± 0.5 | 2.3 ± 0.8 | 3.5 ± 0.7  | 3.4 ± 0.4 | 3.2 ± 0.3  | 3.3 ± 0.3  | 3.2 ± 0.7  | 3.4 ± 0.5  |
| ZINC33357190-con1 | 0.9 ± 0.2 | 0.9 ± 0.2 | 1.1 ± 0.3 | 1.2 ± 0.2 | 1.3 ± 0.3 | 1.3 ± 0.2  | 1.7 ± 0.3 | 1.9 ± 0.3  | 2.0 ± 0.3  | 1.7 ± 0.4  | 1.8 ± 0.4  |
| ZINC3510461-con1  | 2.4 ± 0.4 | 2.6 ± 0.3 | 2.6 ± 0.3 | 2.7 ± 0.2 | 2.8 ± 0.3 | 2.7 ± 0.3  | 2.6 ± 0.1 | 2.6 ± 0.2  | 2.5 ± 0.1  | 2.7 ± 0.2  | 2.6 ± 0.2  |
| ZINC40583292-con1 | 1.2 ± 0.3 | 1.2 ± 0.3 | 1.6 ± 0.5 | 1.6 ± 0.5 | 1.8 ± 0.5 | 2.0 ± 0.4  | 2.3 ± 0.4 | 2.0 ± 0.4  | 1.9 ± 0.4  | 2.0 ± 0.4  | 2.1 ± 0.4  |
| ZINC49405771-con1 | 1.5 ± 0.2 | 1.6 ± 0.3 | 2.2 ± 0.6 | 2.5 ± 0.6 | 2.5 ± 0.6 | 3.4 ± 0.7  | 2.9 ± 0.3 | 4.3 ± 0.5  | 5.5 ± 1.4  | 3.7 ± 1.3  | 4.0 ± 1.3  |
| ZINC71886989-con1 | 1.1 ± 0.3 | 1.2 ± 0.3 | 1.1 ± 0.2 | 1.2 ± 0.3 | 1.3 ± 0.3 | 1.4 ± 0.3  | 1.3 ± 0.3 | 1.2 ± 0.3  | 1.2 ± 0.2  | 1.3 ± 0.3  | 1.3 ± 0.3  |
| ARQ-068-con1      | 1.0 ± 0.3 | 1.0 ± 0.2 | 1.1 ± 0.3 | 1.2 ± 0.3 | 1.1 ± 0.3 | 1.7 ± 0.5  | 2.0 ± 0.6 | 2.3 ± 0.6  | 2.5 ± 0.6  | 1.9 ± 0.7  | 2.1 ± 0.6  |
| ARQ-068-con2      | 0.7 ± 0.3 | 0.8 ± 0.3 | 1.0 ± 0.4 | 1.3 ± 0.7 | 1.6 ± 0.9 | 3.9 ± 1.3  | 4.7 ± 0.4 | 4.8 ± 0.4  | 4.8 ± 0.3  | 3.9 ± 1.5  | 4.5 ± 0.8  |

### 3. Abbreviations

GPU, graphics processing unit; FGFR, fibroblast growth factor receptor; MM/GBSA, molecular mechanics energies combined with the generalized Born and surface area continuum solvation; MD, molecular dynamics; RMSD, root-mean-square deviation; eEF2K, eukaryotic elongation factor 2 kinase; RTK, receptor tyrosine kinase; DFG, Asp-Phe-Gly; GAFF, generalized Amber force field; TIP3P, transferable intermolecular potential with 3 points; NVT, constant number (N), volume (V), and temperature (T); NPT, constant number (N), pressure (P), and temperature (T); Min, minimization; N.S., no significance; ANOVA, Analysis of variance; MW, molecular weight.

## References

- S1 L. Duan, X. Liu, and J. Z. Zhang, *J Am Chem Soc*, 2016, **138**, 5722.
- S2 S. Eathiraj, R. Palma, M. Hirschi, E. Volckova, E. Nakuci, J. Castro, C. R. Chen, T. C. K. Chan, D. S. France, and M. A. Ashwell, *J. Biol. Chem.*, 2011, **286**, 20677.
- S3 Y. Nakanishi, N. Akiyama, T. Tsukaguchi, T. Fujii, K. Sakata, H. Sase, T. Isobe, K. Morikami, H. Shindoh, T. Mio, H. Ebiike, N. Taka, Y. Aoki, and N. Ishii, *Mol. Cancer Ther.*, 2014, **13**, 2547.
- S4 C. D. Sohl, M. R. Ryan, B. B. Luo, K. M. Frey, and K. S. Anderson, *ACS Chem. Biol.*, 2015, **10**, 1319.
- S5 E. Bello, G. Colella, V. Scarlato, P. Oliva, A. Berndt, G. Valbusa, S. C. Serra, M. Incalci, E. Cavalletti, R. Giavazzi, G. Damia, and G. Camboni, *Cancer Res.*, 2011, **71**, 1396.
- S6 D. C. Wu, M. Guo, M. A. Philips, L. Z. Qu, L. Y. Jiang, J. Li, X. J. Chen, Z. C. Chen, L. Chen, and Y. H. Chen, *PLOS ONE*, 2016, **11**, e0162491.
- S7 G. S. Zhao, W. Y. Li, D. H. Chen, J. R. Henry, H. Y. Li, Z. G. Chen, M. Zia-Ebrahimi, L. Bloem, Y. Zhai, K. Huss, S. B. Peng, and D. J. McCann, *Mol. Cancer Ther.*, 2011, **10**, 2200.
- S8 P. R. Gavine, L. Mooney, E. Kilgour, A. P. Thomas, K. Al Kadhimi, S. Beck, C. Rooney, T. Coleman, D. Baker, M. J. Mellor, A. N. Brooks, and T. Klinowska, *Cancer Res.*, 2012, **72**, 2045.
- S9 J. Liu, X. Peng, Y. Dai, W. Zhang, S. M. Ren, J. Ai, M. Y. Geng, and Y. X. Li, *Org. Biomol. Chem.*, 2015, **13**, 7643.
- S10 T. D. Bunney, S. Z. Wan, N. Thiyagarajan, L. Sutto, S. V. Williams, P. Ashford,

- H. Koss, M. A. Knowles, F. L. Gervasio, P. V. Coveney, and M. Katan, *Electromagn. Biol. Med.*, 2015, **2**, 194.
- S11 S. Trudel, Z. H. Li, E. Wei, M. Wiesmann, H. Chang, C. Chen, D. Reece, C. Heise, and A. K. Stewart, *Blood*, 2005, **105**, 2941.
- S12 H. Patani, T. D. Bunney, N. Thiyagarajan, R. A. Norman, D. Ogg, J. Breed, P. Ashford, A. Potterton, M. Edwards, S. V. Williams, G. S. Thomson, C. S. M. Pang, M. A. Knowles, A. L. Breeze, C. Orengo, C. Phillips, and M. Katan, *Oncotarget*, 2016, **7**, 24252.
- S13 T. P. S. Perera, E. Jovcheva, L. Mevellec, J. Vialard, D. De Lange, T. Verhulst, C. Paulussen, K. Van De Ven, P. King, E. Freyne, D. C. Rees, M. Squires, G. Saxty, M. Page, C. W. Murray, R. Gilissen, G. Ward, N. T. Thompson, D. R. Newell, N. Cheng, L. Xie, J. Yang, S. J. Platero, J. D. Karkera, C. Moy, P. Angibaud, S. Laquerre, and M. V. Lorenzi, *Mol. Cancer Ther.*, 2017, **16**, 1010.
- S14 M. Matsuki, T. Hoshi, Y. Yamamoto, M. Ikemori Kawada, Y. Minoshima, Y. Funahashi, and J. Matsui, *Cancer Med.*, 2018, **7**, 2641.
- S15 J. Matsui, Y. Yamamoto, Y. Funahashi, A. Tsuruoka, T. Watanabe, T. Wakabayashi, T. Uenaka, and M. Asada, *Int. J. Cancer*, 2008, **122**, 664.
- S16 S. Watanabe Miyano, Y. Yamamoto, K. Kodama, Y. Miyajima, M. Mikamoto, T. Nakagawa, H. Kuramochi, S. Funasaka, S. Nagao, N. H. Sugi, K. Okamoto, Y. Minoshima, Y. Nakatani, Y. Karoji, I. Ohashi, Y. Yamane, T. Okada, T. Matsushima, J. Matsui, M. Iwata, T. Uenaka, and A. Tsuruoka, *Mol. Cancer Ther.*, 2016, **15**, 2630.

- S17 A. Kikuchi, T. Suzuki, T. Nakazawa, M. Iizuka, A. Nakayama, T. Ozawa, M. Kameda, N. Shindoh, T. Terasaka, M. Hirano, and S. Kuromitsu, *Cancer Sci.*, 2016, **108**, 236.
- S18 M. Kameda, I. Kuriwaki, K. Iikubo, H. Hisamichi, Y. Kawamoto, H. Moritomo, and T. Suzuki, inventors Nitrogen-containing aromatic heterocyclic compound. 2013 February 26, 2013.
- S19 W. Guo, W. H. Hang, and J. S. Li, inventors Novel pyrimidine and pyridine compounds and their usage. 2014 March 14, 2014.
- S20 T. G. Hall, Y. Yu, S. Eathiraj, Y. X. Wang, R. E. Savage, J. M. Lapierre, B. Schwartz, and G. Abbadessa, *PLOS ONE*, 2016, **11**, e0162594.
- S21 N. Zhou, Y. Xu, X. Liu, Y. Wang, J. Peng, X. Luo, M. Zheng, K. Chen, and H. Jiang, *Int. J. Mol. Sci.*, 2015, **16**, 13407.
- S22 A. Jiang, Q. F. Liu, R. F. Wang, P. Wei, Y. Dai, X. Wang, Y. C. Xu, Y. C. Ma, J. Ai, J. K. Shen, J. Ding, and B. Xiong, *Molecules*, 2018, **23**.
- S23 S. Eathiraj, R. Palma, M. Hirschi, E. Volckova, E. Nakuci, J. Castro, C. R. Chen, T. C. K. Chan, D. S. France, and M. A. Ashwell, *J. Biol. Chem.*, 2011, **286**, 20677.
